# Supplementary material for: Species traits modify the species-area relationship in ground-beetle (Coleoptera: Carabidae) assemblages on islands in a boreal lake
Source: PLoS One. 2017 Dec 20;12(12):e0190174. doi: 10.1371/journal.pone.0190174 (PMC5738139; doi:10.1371/journal.pone.0190174)
Supplement: S1 Dataset — (CSV) [file pone.0190174.s001.csv]

genus	species	island	trap	date.collected	sex	bodylength	count	area
Calathus	ingratus	AL	5	8-Jul	M	8.812	1	0.7
Calathus	ingratus	AL	5	8-Jul	M	8.87	1	0.7
Calathus	ingratus	AL	1	8-Jul	F	8.604	1	0.7
Calathus	ingratus	AL	3	8-Jul	F	8.836	1	0.7
Calathus	ingratus	AL	7	25-Jun	M	9.853	1	0.7
Calathus	ingratus	AL	7	25-Jun	M	8.131	1	0.7
Calathus	ingratus	AL	7	25-Jun	M	8.088	1	0.7
Calathus	ingratus	AL	7	25-Jun	F	8.729	1	0.7
Calathus	ingratus	AL	7	25-Jun	F	8.886	1	0.7
Calathus	ingratus	AL	7	25-Jun	F	8.527	1	0.7
Calathus	ingratus	AL	7	25-Jun	F	7.357	1	0.7
Calathus	ingratus	AL	7	25-Jun	F	9.203	1	0.7
Calathus	ingratus	AL	7	25-Jun	F	8.857	1	0.7
Calathus	ingratus	AL	7	25-Jun	F	7.521	1	0.7
Calathus	ingratus	AL	4	25-Jun	M	8.207	1	0.7
Calathus	ingratus	AL	4	25-Jun	M	8.132	1	0.7
Calathus	ingratus	AL	4	25-Jun	F	9.198	1	0.7
Calathus	ingratus	AL	4	25-Jun	F	8.414	1	0.7
Calathus	ingratus	AL	4	25-Jun	F	8.485	1	0.7
Calathus	ingratus	AL	4	25-Jun	F	9.133	1	0.7
Calathus	ingratus	AL	4	25-Jun	F	7.308	1	0.7
Calathus	ingratus	AL	5	25-Jun	F	8.762	1	0.7
Calathus	ingratus	AL	6	25-Jun	F	8.15	1	0.7
Calathus	ingratus	AL	3	25-Jun	M	8.542	1	0.7
Calathus	ingratus	AL	3	25-Jun	M	8.743	1	0.7
Calathus	ingratus	AL	3	25-Jun	M	7.906	1	0.7
Calathus	ingratus	AL	3	25-Jun	M	7.967	1	0.7
Calathus	ingratus	AL	3	25-Jun	M	8.265	1	0.7
Calathus	ingratus	AL	3	25-Jun	F	7.936	1	0.7
Calathus	ingratus	AL	3	25-Jun	F	9.78	1	0.7
Calathus	ingratus	AL	1	25-Jun	F	9.444	1	0.7
Calathus	ingratus	AL	1	25-Jun	F	8.623	1	0.7
Calathus	ingratus	AL	1	25-Jun	F	8.292	1	0.7
Calathus	ingratus	AL	1	25-Jun	M	9.497	1	0.7
Calathus	ingratus	AL	7	19-Aug	M	7.807	1	0.7
Calathus	ingratus	AL	7	19-Aug	M	7.922	1	0.7
Calathus	ingratus	AL	7	19-Aug	M	7.657	1	0.7
Calathus	ingratus	AL	3	22-Jul	M	8.004	1	0.7
Calathus	ingratus	AL	3	22-Jul	M	8.519	1	0.7
Calathus	ingratus	AL	3	22-Jul	M	8.622	1	0.7
Calathus	ingratus	AL	1	22-Jul	M	8.217	1	0.7
Calathus	ingratus	BI	4	28-Jun	F	8.192	1	980.7
Calathus	ingratus	BI	5	9-Aug	F	8.438	1	980.7
Calathus	ingratus	BI	4	25-Jul	F	9.433	1	980.7
Calathus	ingratus	BI	4	25-Jul	F	8.132	1	980.7
Calathus	ingratus	BI	4	25-Jul	F	8.169	1	980.7
Calathus	ingratus	BI	4	25-Jul	F	7.58	1	980.7
Calathus	ingratus	BI	4	25-Jul	F	9.234	1	980.7
Calathus	ingratus	BI	4	25-Jul	M	8.265	1	980.7
Calathus	ingratus	BI	4	25-Jul	M	9.104	1	980.7
Calathus	ingratus	BI	3	25-Jul	F	8.44	1	980.7
Calathus	ingratus	BI	6	25-Jul	F	8.492	1	980.7
Calathus	ingratus	BI	8	25-Jul	M	7.965	1	980.7
Calathus	ingratus	BI	3	28-Jun	F	8.068	1	980.7
Calathus	ingratus	BI	3	28-Jun	F	8.322	1	980.7
Calathus	ingratus	BI	3	28-Jun	F	8.686	1	980.7
Calathus	ingratus	BI	3	28-Jun	F	7.835	1	980.7
Calathus	ingratus	BI	6	10-Jul	M	9.217	1	980.7
Calathus	ingratus	BI	6	10-Jul	M	8.975	1	980.7
Calathus	ingratus	BI	6	10-Jul	F	7.744	1	980.7
Calathus	ingratus	BI	6	10-Jul	F	8.191	1	980.7
Calathus	ingratus	BI	6	10-Jul	F	7.619	1	980.7
Calathus	ingratus	BI	6	10-Jul	F	10.132	1	980.7
Calathus	ingratus	BI	2	10-Jul	M	8.015	1	980.7
Calathus	ingratus	BI	2	10-Jul	M	7.531	1	980.7
Calathus	ingratus	BI	2	10-Jul	F	7.963	1	980.7
Calathus	ingratus	BI	2	10-Jul	F	7.568	1	980.7
Calathus	ingratus	BI	1	28-Jun	M	9.22	1	980.7
Calathus	ingratus	BI	6	25-Jul	F	9.106	1	980.7
Calathus	ingratus	BR	7	9-Jul	M	9.276	1	255.1
Calathus	ingratus	BR	7	9-Jul	F	8.051	1	255.1
Calathus	ingratus	BR	7	9-Jul	F	9.73	1	255.1
Calathus	ingratus	BR	7	9-Jul	F	9.575	1	255.1
Calathus	ingratus	BR	5	9-Jul	M	9.193	1	255.1
Calathus	ingratus	BR	5	9-Jul	M	8.136	1	255.1
Calathus	ingratus	BR	5	9-Jul	M	8.248	1	255.1
Calathus	ingratus	BR	5	9-Jul	F	9.163	1	255.1
Calathus	ingratus	BR	5	9-Jul	F	8.529	1	255.1
Calathus	ingratus	BR	5	9-Jul	F	8.588	1	255.1
Calathus	ingratus	BR	3	8-Aug	F	7.845	1	255.1
Calathus	ingratus	BR	5	8-Aug	F	8.27	1	255.1
Calathus	ingratus	BR	5	8-Aug	F	9.232	1	255.1
Calathus	ingratus	BR	5	8-Aug	F	7.816	1	255.1
Calathus	ingratus	BR	5	8-Aug	M	8.123	1	255.1
Calathus	ingratus	BR	5	8-Aug	M	8.224	1	255.1
Calathus	ingratus	BR	5	8-Aug	M	8.628	1	255.1
Calathus	ingratus	BR	8	8-Aug	F	8.547	1	255.1
Calathus	ingratus	BR	8	8-Aug	F	8.92	1	255.1
Calathus	ingratus	BR	8	8-Aug	F	8.624	1	255.1
Calathus	ingratus	BR	4	8-Aug	F	9.486	1	255.1
Calathus	ingratus	BR	4	8-Aug	F	8.471	1	255.1
Calathus	ingratus	BR	4	8-Aug	M	8.675	1	255.1
Calathus	ingratus	BR	4	8-Aug	M	8.975	1	255.1
Calathus	ingratus	BR	5	23-Jul	M	8.502	1	255.1
Calathus	ingratus	BR	5	23-Jul	M	7.736	1	255.1
Calathus	ingratus	BR	5	23-Jul	M	7.766	1	255.1
Calathus	ingratus	BR	5	23-Jul	F	7.876	1	255.1
Calathus	ingratus	BR	5	23-Jul	F	8.62	1	255.1
Calathus	ingratus	BR	5	23-Jul	F	8.948	1	255.1
Calathus	ingratus	BR	5	23-Jul	F	8.782	1	255.1
Calathus	ingratus	BR	5	23-Jul	F	8.645	1	255.1
Calathus	ingratus	BR	5	23-Jul	F	7.96	1	255.1
Calathus	ingratus	BR	5	23-Jul	F	9.112	1	255.1
Calathus	ingratus	BR	6	23-Jul	F	8.018	1	255.1
Calathus	ingratus	BR	2	23-Jul	F	8.427	1	255.1
Calathus	ingratus	BR	2	23-Jul	F	7.786	1	255.1
Calathus	ingratus	BR	2	23-Jul	F	8.886	1	255.1
Calathus	ingratus	BR	2	23-Jul	F	8.715	1	255.1
Calathus	ingratus	BR	2	23-Jul	F	8.49	1	255.1
Calathus	ingratus	BR	2	23-Jul	F	8.75	1	255.1
Calathus	ingratus	BR	2	23-Jul	F	7.632	1	255.1
Calathus	ingratus	BR	2	23-Jul	F	9.322	1	255.1
Calathus	ingratus	BR	2	23-Jul	F	9.058	1	255.1
Calathus	ingratus	BR	2	23-Jul	M	7.83	1	255.1
Calathus	ingratus	BR	2	23-Jul	M	7.658	1	255.1
Calathus	ingratus	BR	1	23-Jul	M	8.972	1	255.1
Calathus	ingratus	BR	1	23-Jul	M	8.888	1	255.1
Calathus	ingratus	BR	1	23-Jul	M	8.74	1	255.1
Calathus	ingratus	BR	1	23-Jul	M	8.45	1	255.1
Calathus	ingratus	BR	1	23-Jul	M	7.569	1	255.1
Calathus	ingratus	BR	1	23-Jul	M	7.697	1	255.1
Calathus	ingratus	BR	1	23-Jul	M	8.145	1	255.1
Calathus	ingratus	BR	1	23-Jul	F	8.216	1	255.1
Calathus	ingratus	BR	1	23-Jul	F	9.086	1	255.1
Calathus	ingratus	BR	3	23-Jul	F	8.159	1	255.1
Calathus	ingratus	BR	3	23-Jul	F	7.842	1	255.1
Calathus	ingratus	BR	3	23-Jul	F	8.485	1	255.1
Calathus	ingratus	BR	3	23-Jul	F	8.546	1	255.1
Calathus	ingratus	BR	8	23-Jul	F	7.902	1	255.1
Calathus	ingratus	BR	8	23-Jul	F	8.917	1	255.1
Calathus	ingratus	BR	8	23-Jul	F	7.858	1	255.1
Calathus	ingratus	BR	8	23-Jul	F	8.512	1	255.1
Calathus	ingratus	BR	8	23-Jul	F	8.611	1	255.1
Calathus	ingratus	BR	8	23-Jul	F	9.608	1	255.1
Calathus	ingratus	BR	8	23-Jul	F	7.523	1	255.1
Calathus	ingratus	BR	2	8-Aug	F	8.541	1	255.1
Calathus	ingratus	BR	2	8-Aug	F	8.82	1	255.1
Calathus	ingratus	BR	2	8-Aug	M	8.133	1	255.1
Calathus	ingratus	BR	3	22-Aug	M	8.162	1	255.1
Calathus	ingratus	BR	1	22-Aug	F	9.611	1	255.1
Calathus	ingratus	BR	1	22-Aug	F	8.732	1	255.1
Calathus	ingratus	BR	6	22-Aug	M	8.816	1	255.1
Calathus	ingratus	BR	3	9-Jul	F	8.236	1	255.1
Calathus	ingratus	BR	3	9-Jul	F	8.207	1	255.1
Calathus	ingratus	BR	6	27-Jun	F	8.968	1	255.1
Calathus	ingratus	BR	3	27-Jun	F	9.602	1	255.1
Calathus	ingratus	BR	3	27-Jun	F	8.808	1	255.1
Calathus	ingratus	BR	4	9-Jul	F	8.59	1	255.1
Calathus	ingratus	BR	4	9-Jul	F	9.331	1	255.1
Calathus	ingratus	BR	4	9-Jul	M	8.38	1	255.1
Calathus	ingratus	BR	4	9-Jul	M	8.279	1	255.1
Calathus	ingratus	BR	4	9-Jul	M	7.715	1	255.1
Calathus	ingratus	CC	7	4-Jul	F	7.812	1	21.1
Calathus	ingratus	CC	2	19-Jun	F	8.966	1	21.1
Calathus	ingratus	CC	2	18-Jul	F	8.325	1	21.1
Calathus	ingratus	CC	2	18-Jul	F	7.407	1	21.1
Calathus	ingratus	CC	2	18-Jul	M	8.157	1	21.1
Calathus	ingratus	CC	2	18-Jul	M	8.291	1	21.1
Calathus	ingratus	CC	8	18-Jul	M	8.604	1	21.1
Calathus	ingratus	CC	7	19-Jul	M	8.028	1	21.1
Calathus	ingratus	CD	5	18-Jun	F	9.048	1	3.2
Calathus	ingratus	CD	5	18-Jun	M	7.742	1	3.2
Calathus	ingratus	CD	5	18-Jun	M	7.827	1	3.2
Calathus	ingratus	CD	8	18-Jun	F	8.524	1	3.2
Calathus	ingratus	CD	8	18-Jun	F	9.203	1	3.2
Calathus	ingratus	CD	3	5-Jul	F	9.182	1	3.2
Calathus	ingratus	CD	3	5-Jul	F	7.848	1	3.2
Calathus	ingratus	CD	3	5-Jul	F	7.875	1	3.2
Calathus	ingratus	CD	3	5-Jul	F	9.12	1	3.2
Calathus	ingratus	CD	5	5-Jul	F	8.946	1	3.2
Calathus	ingratus	CD	4	19-Jul	M	8.819	1	3.2
Calathus	ingratus	CD	4	19-Jul	M	7.785	1	3.2
Calathus	ingratus	CD	4	19-Jul	M	7.912	1	3.2
Calathus	ingratus	CD	4	19-Jul	M	7.637	1	3.2
Calathus	ingratus	CI	5	9-Jul	M	8.201	1	1.2
Calathus	ingratus	CI	5	9-Jul	M	7.642	1	1.2
Calathus	ingratus	CI	5	9-Jul	M	7.984	1	1.2
Calathus	ingratus	CI	3	9-Jul	M	8.879	1	1.2
Calathus	ingratus	CI	8	9-Jul	F	9.301	1	1.2
Calathus	ingratus	CU	3	4-Jul	F	8.017	1	1.5
Calathus	ingratus	CU	3	4-Jul	F	7.834	1	1.5
Calathus	ingratus	CU	3	4-Jul	F	9.087	1	1.5
Calathus	ingratus	CU	8	4-Jul	F	7.891	1	1.5
Calathus	ingratus	CU	8	4-Jul	F	8.408	1	1.5
Calathus	ingratus	CU	8	4-Jul	M	8.104	1	1.5
Calathus	ingratus	CU	5	4-Jul	M	8.87	1	1.5
Calathus	ingratus	CU	5	4-Jul	M	8.506	1	1.5
Calathus	ingratus	CU	5	4-Jul	F	9.744	1	1.5
Calathus	ingratus	CU	5	4-Jul	F	9.004	1	1.5
Calathus	ingratus	CU	5	4-Jul	F	8.183	1	1.5
Calathus	ingratus	CU	3	4-Jul	M	8.496	1	1.5
Calathus	ingratus	CU	3	4-Jul	M	8.635	1	1.5
Calathus	ingratus	CU	3	4-Jul	M	8.244	1	1.5
Calathus	ingratus	CU	3	4-Jul	M	8.63	1	1.5
Calathus	ingratus	CU	3	4-Jul	F	8.069	1	1.5
Calathus	ingratus	CU	3	4-Jul	F	9.651	1	1.5
Calathus	ingratus	CU	3	4-Jul	F	9.274	1	1.5
Calathus	ingratus	CU	3	4-Jul	F	8.179	1	1.5
Calathus	ingratus	CU	5	17-Jul	F	8.662	1	1.5
Calathus	ingratus	CU	5	17-Jul	F	8.824	1	1.5
Calathus	ingratus	CU	5	17-Jul	F	9.157	1	1.5
Calathus	ingratus	CU	5	17-Jul	M	9.16	1	1.5
Calathus	ingratus	CU	5	17-Jul	M	8.622	1	1.5
Calathus	ingratus	CU	5	17-Jul	M	9.249	1	1.5
Calathus	ingratus	CU	5	17-Jul	M	9.206	1	1.5
Calathus	ingratus	CU	5	17-Jul	M	7.705	1	1.5
Calathus	ingratus	CU	7	1-Aug	M	7.927	1	1.5
Calathus	ingratus	CU	7	1-Aug	M	7.971	1	1.5
Calathus	ingratus	CU	7	1-Aug	M	8.486	1	1.5
Calathus	ingratus	CU	3	1-Aug	M	8.905	1	1.5
Calathus	ingratus	CU	3	1-Aug	M	7.603	1	1.5
Calathus	ingratus	CU	3	1-Aug	F	9.199	1	1.5
Calathus	ingratus	CU	3	1-Aug	F	8.894	1	1.5
Calathus	ingratus	CU	5	17-Jun	F	8.822	1	1.5
Calathus	ingratus	CU	5	17-Jun	F	9.431	1	1.5
Calathus	ingratus	CU	5	17-Jun	M	8.56	1	1.5
Calathus	ingratus	CU	7	17-Jun	M	8.315	1	1.5
Calathus	ingratus	CU	7	17-Jun	M	8.744	1	1.5
Calathus	ingratus	DG	7	3-Jul	F	8.253	1	10.3
Calathus	ingratus	DG	7	3-Jul	F	7.972	1	10.3
Calathus	ingratus	DG	7	3-Jul	M	8.537	1	10.3
Calathus	ingratus	DG	3	19-Jun	M	7.996	1	10.3
Calathus	ingratus	DG	5	3-Jul	M	8.303	1	10.3
Calathus	ingratus	DG	5	3-Jul	M	7.342	1	10.3
Calathus	ingratus	DG	2	19-Jun	F	8.88	1	10.3
Calathus	ingratus	DG	2	19-Jun	F	8.249	1	10.3
Calathus	ingratus	DG	2	19-Jun	F	8.684	1	10.3
Calathus	ingratus	DG	2	19-Jun	F	8.406	1	10.3
Calathus	ingratus	DG	2	19-Jun	F	8.004	1	10.3
Calathus	ingratus	DG	2	19-Jun	M	8.313	1	10.3
Calathus	ingratus	DG	5	19-Jun	F	8.303	1	10.3
Calathus	ingratus	DG	5	19-Jun	F	9.203	1	10.3
Calathus	ingratus	DG	5	19-Jun	M	7.613	1	10.3
Calathus	ingratus	DG	6	19-Jun	F	8.637	1	10.3
Calathus	ingratus	DG	6	19-Jun	F	7.304	1	10.3
Calathus	ingratus	DG	1	19-Jun	M	8.039	1	10.3
Calathus	ingratus	DG	1	19-Jun	F	7.776	1	10.3
Calathus	ingratus	DG	1	19-Jun	F	8.705	1	10.3
Calathus	ingratus	DG	1	19-Jun	F	8.271	1	10.3
Calathus	ingratus	DG	5	18-Jul	F	7.681	1	10.3
Calathus	ingratus	DG	5	18-Jul	F	9.078	1	10.3
Calathus	ingratus	DG	5	18-Jul	F	8.894	1	10.3
Calathus	ingratus	DG	5	18-Jul	M	7.574	1	10.3
Calathus	ingratus	DG	5	18-Jul	M	8.559	1	10.3
Calathus	ingratus	DG	5	18-Jul	M	8.192	1	10.3
Calathus	ingratus	DG	7	18-Jul	M	7.561	1	10.3
Calathus	ingratus	DG	7	18-Jul	M	7.663	1	10.3
Calathus	ingratus	DG	5	19-Jun	F	9.345	1	10.3
Calathus	ingratus	DG	5	19-Jun	F	8.353	1	10.3
Calathus	ingratus	DG	3	18-Jun	M	8.141	1	10.3
Calathus	ingratus	DG	3	18-Jun	M	8.633	1	10.3
Calathus	ingratus	DG	3	18-Jun	M	8.507	1	10.3
Calathus	ingratus	DG	3	18-Jun	M	8.754	1	10.3
Calathus	ingratus	DG	3	18-Jun	M	8.248	1	10.3
Calathus	ingratus	DG	3	18-Jun	M	8.662	1	10.3
Calathus	ingratus	DG	3	18-Jun	M	8.188	1	10.3
Calathus	ingratus	DG	3	18-Jun	M	8.85	1	10.3
Calathus	ingratus	DG	3	18-Jun	F	9.165	1	10.3
Calathus	ingratus	EW	4	29-Jul	F	8.986	1	0.2
Calathus	ingratus	EW	4	29-Jul	M	7.961	1	0.2
Calathus	ingratus	EW	6	29-Jul	M	7.255	1	0.2
Calathus	ingratus	EW	6	29-Jul	M	7.922	1	0.2
Calathus	ingratus	FI	8	9-Jul	M	8.527	1	0.3
Calathus	ingratus	FI	8	27-Jun	F	8.833	1	0.5
Calathus	ingratus	FI	8	27-Jun	F	8.792	1	0.5
Calathus	ingratus	FI	8	27-Jun	F	9.174	1	0.5
Calathus	ingratus	FI	4	8-Aug	M	9.134	1	0.5
Calathus	ingratus	FI	4	8-Aug	M	10.036	1	0.5
Calathus	ingratus	FI	4	8-Aug	M	9.039	1	0.5
Calathus	ingratus	FI	4	9-Jul	M	9.153	1	0.5
Calathus	ingratus	FI	4	9-Jul	F	8.67	1	0.5
Calathus	ingratus	FI	4	9-Jul	F	8.722	1	0.5
Calathus	ingratus	FI	7	23-Jul	M	9.394	1	0.5
Calathus	ingratus	FI	7	23-Jul	M	9.308	1	0.5
Calathus	ingratus	FU	8	3-Jul	F	8.333	1	2.6
Calathus	ingratus	FU	8	3-Jul	F	8.553	1	2.6
Calathus	ingratus	FU	8	3-Jul	F	8.139	1	2.6
Calathus	ingratus	FU	8	3-Jul	F	7.847	1	2.6
Calathus	ingratus	FU	8	3-Jul	F	8.842	1	2.6
Calathus	ingratus	FU	8	3-Jul	F	7.718	1	2.6
Calathus	ingratus	FU	8	3-Jul	F	8.016	1	2.6
Calathus	ingratus	FU	2	3-Jul	M	8.634	1	2.6
Calathus	ingratus	FU	2	3-Jul	M	8.108	1	2.6
Calathus	ingratus	FU	2	3-Jul	M	8.466	1	2.6
Calathus	ingratus	FU	2	3-Jul	M	7.972	1	2.6
Calathus	ingratus	FU	2	3-Jul	F	8.566	1	2.6
Calathus	ingratus	FU	2	3-Jul	F	8.374	1	2.6
Calathus	ingratus	FU	2	3-Jul	F	8.194	1	2.6
Calathus	ingratus	FU	2	3-Jul	F	8.335	1	2.6
Calathus	ingratus	FU	7	3-Jul	F	8.114	1	2.6
Calathus	ingratus	FU	7	3-Jul	F	8.845	1	2.6
Calathus	ingratus	FU	7	3-Jul	F	8.47	1	2.6
Calathus	ingratus	FU	7	3-Jul	M	8.196	1	2.6
Calathus	ingratus	FU	7	3-Jul	M	8.025	1	2.6
Calathus	ingratus	FU	7	3-Jul	M	7.998	1	2.6
Calathus	ingratus	FU	7	3-Jul	M	8.207	1	2.6
Calathus	ingratus	FU	8	19-Jun	F	8.532	1	2.6
Calathus	ingratus	FU	8	19-Jun	F	8.093	1	2.6
Calathus	ingratus	FU	8	19-Jun	F	8.858	1	2.6
Calathus	ingratus	FU	6	19-Jun	F	8.248	1	2.6
Calathus	ingratus	FU	8	18-Jul	M	8.391	1	2.6
Calathus	ingratus	FU	8	18-Jul	M	8.104	1	2.6
Calathus	ingratus	FU	8	18-Jul	M	8.655	1	2.6
Calathus	ingratus	FU	8	18-Jul	M	7.903	1	2.6
Calathus	ingratus	FU	8	18-Jul	M	8.184	1	2.6
Calathus	ingratus	FU	8	18-Jul	M	7.465	1	2.6
Calathus	ingratus	FU	1	3-Jul	F	8.939	1	2.6
Calathus	ingratus	FU	1	3-Jul	F	8.251	1	2.6
Calathus	ingratus	FU	8	18-Jul	M	8.386	1	2.6
Calathus	ingratus	FU	8	18-Jul	M	8.521	1	2.6
Calathus	ingratus	FU	8	18-Jul	M	8.612	1	2.6
Calathus	ingratus	FU	8	18-Jul	M	8.18	1	2.6
Calathus	ingratus	FU	8	18-Jul	M	8.308	1	2.6
Calathus	ingratus	FU	8	18-Jul	M	8.801	1	2.6
Calathus	ingratus	GL	6	8-Jul	M	8.526	1	0.7
Calathus	ingratus	GL	6	8-Jul	M	8.607	1	0.7
Calathus	ingratus	GL	6	8-Jul	M	8.473	1	0.7
Calathus	ingratus	GL	6	8-Jul	M	8.264	1	0.7
Calathus	ingratus	GL	6	8-Jul	M	8.4	1	0.7
Calathus	ingratus	GL	6	8-Jul	M	7.832	1	0.7
Calathus	ingratus	GL	6	8-Jul	M	8.233	1	0.7
Calathus	ingratus	GL	6	8-Jul	M	8.259	1	0.7
Calathus	ingratus	GL	6	8-Jul	M	8.304	1	0.7
Calathus	ingratus	GL	6	8-Jul	M	8.089	1	0.7
Calathus	ingratus	GL	6	8-Jul	M	8.007	1	0.7
Calathus	ingratus	GL	6	8-Jul	M	6.42	1	0.7
Calathus	ingratus	GL	6	8-Jul	M	6.277	1	0.7
Calathus	ingratus	GL	6	8-Jul	M	8.036	1	0.7
Calathus	ingratus	GL	6	8-Jul	M	7.932	1	0.7
Calathus	ingratus	GL	6	8-Jul	M	7.822	1	0.7
Calathus	ingratus	GL	6	8-Jul	M	8.568	1	0.7
Calathus	ingratus	GL	6	8-Jul	M	8.526	1	0.7
Calathus	ingratus	GL	6	8-Jul	M	8.399	1	0.7
Calathus	ingratus	GL	6	8-Jul	M	8.204	1	0.7
Calathus	ingratus	GL	6	8-Jul	M	8.292	1	0.7
Calathus	ingratus	GL	6	8-Jul	M	8.012	1	0.7
Calathus	ingratus	GL	8	25-Jun	F	9.26	1	0.7
Calathus	ingratus	GL	2	22-Jul	F	8.583	1	0.7
Calathus	ingratus	GL	2	22-Jul	F	8.678	1	0.7
Calathus	ingratus	GL	7	7-Aug	F	9.27	1	0.7
Calathus	ingratus	GL	5	19-Aug	F	8.609	1	0.7
Calathus	ingratus	GL	5	22-Jul	F	8.363	1	0.7
Calathus	ingratus	GL	5	22-Jul	F	8.917	1	0.7
Calathus	ingratus	GL	5	22-Jul	F	8.713	1	0.7
Calathus	ingratus	GL	6	22-Jul	F	8.876	1	0.7
Calathus	ingratus	GL	6	22-Jul	F	8.559	1	0.7
Calathus	ingratus	GL	5	7-Aug	F	8.774	1	0.7
Calathus	ingratus	GL	5	7-Aug	F	8.966	1	0.7
Calathus	ingratus	GL	5	7-Aug	F	9.277	1	0.7
Calathus	ingratus	GL	5	7-Aug	F	9.098	1	0.7
Calathus	ingratus	GL	5	7-Aug	F	8.854	1	0.7
Calathus	ingratus	GL	5	7-Aug	F	8.526	1	0.7
Calathus	ingratus	GL	5	7-Aug	F	9.531	1	0.7
Calathus	ingratus	GL	5	7-Aug	F	8.629	1	0.7
Calathus	ingratus	GL	5	7-Aug	F	9.154	1	0.7
Calathus	ingratus	GL	5	7-Aug	F	8.414	1	0.7
Calathus	ingratus	HB	4	10-Jul	F	9.029	1	0.5
Calathus	ingratus	HB	4	10-Jul	M	7.934	1	0.5
Calathus	ingratus	HB	6	28-Jun	F	8.584	1	0.5
Calathus	ingratus	HB	5	28-Jun	F	8.91	1	0.5
Calathus	ingratus	HB	5	28-Jun	M	7.707	1	0.5
Calathus	ingratus	HB	8	28-Jun	F	8.676	1	0.5
Calathus	ingratus	HB	8	28-Jun	F	7.974	1	0.5
Calathus	ingratus	HB	8	28-Jun	F	7.461	1	0.5
Calathus	ingratus	HB	3	10-Jul	F	8.032	1	0.5
Calathus	ingratus	HB	3	10-Jul	F	8.531	1	0.5
Calathus	ingratus	HB	3	10-Jul	F	8.571	1	0.5
Calathus	ingratus	HB	3	10-Jul	F	9.084	1	0.5
Calathus	ingratus	HB	3	10-Jul	F	9.335	1	0.5
Calathus	ingratus	HB	3	10-Jul	M	8.644	1	0.5
Calathus	ingratus	HB	3	10-Jul	M	8.045	1	0.5
Calathus	ingratus	HB	5	10-Jul	F	8.538	1	0.5
Calathus	ingratus	HB	5	10-Jul	F	8.452	1	0.5
Calathus	ingratus	HB	5	10-Jul	F	8.822	1	0.5
Calathus	ingratus	HB	5	10-Jul	F	8.187	1	0.5
Calathus	ingratus	HB	5	10-Jul	M	8.442	1	0.5
Calathus	ingratus	HB	8	10-Jul	M	8.385	1	0.5
Calathus	ingratus	HB	8	10-Jul	F	8.975	1	0.5
Calathus	ingratus	HB	2	10-Jul	F	8.664	1	0.5
Calathus	ingratus	HB	2	10-Jul	F	8.17	1	0.5
Calathus	ingratus	HB	2	10-Jul	M	8	1	0.5
Calathus	ingratus	HB	6	10-Jul	M	8.186	1	0.5
Calathus	ingratus	HB	6	10-Jul	M	7.385	1	0.5
Calathus	ingratus	HB	6	10-Jul	M	7.93	1	0.5
Calathus	ingratus	HB	6	10-Jul	F	8.576	1	0.5
Calathus	ingratus	HB	6	10-Jul	F	8.728	1	0.5
Calathus	ingratus	HB	2	25-Jul	M	8.467	1	0.5
Calathus	ingratus	HB	2	25-Jul	M	7.777	1	0.5
Calathus	ingratus	HB	2	25-Jul	M	7.229	1	0.5
Calathus	ingratus	HB	7	9-Aug	M	8.345	1	0.5
Calathus	ingratus	JO	1	2-Aug	F	8.986	1	130.2
Calathus	ingratus	JO	1	2-Aug	M	8.309	1	130.2
Calathus	ingratus	JO	2	19-Jul	M	7.695	1	130.2
Calathus	ingratus	JO	7	19-Jun	M	7.888	1	130.2
Calathus	ingratus	JO	7	19-Jun	M	8.331	1	130.2
Calathus	ingratus	JO	2	16-Aug	M	7.726	1	130.2
Calathus	ingratus	JO	7	18-Jun	M	8.572	1	130.2
Calathus	ingratus	JO	7	5-Jul	F	7.392	1	130.2
Calathus	ingratus	JO	5	18-Jun	M	8.263	1	130.2
Calathus	ingratus	JO	5	18-Jun	F	9.87	1	130.2
Calathus	ingratus	JO	8	5-Jul	F	9.619	1	130.2
Calathus	ingratus	JO	6	5-Jul	M	8.453	1	130.2
Calathus	ingratus	JO	6	5-Jul	M	7.935	1	130.2
Calathus	ingratus	JO	6	5-Jul	F	9.641	1	130.2
Calathus	ingratus	JO	6	5-Jul	F	9.31	1	130.2
Calathus	ingratus	JO	8	19-Jul	F	9.144	1	130.2
Calathus	ingratus	JO	8	19-Jul	F	9.224	1	130.2
Calathus	ingratus	JO	8	19-Jul	F	9.992	1	130.2
Calathus	ingratus	JO	8	19-Jul	M	9.061	1	130.2
Calathus	ingratus	KD	2	8-Jul	M	8.241	1	29.4
Calathus	ingratus	KD	2	19-Aug	M	7.785	1	29.4
Calathus	ingratus	KD	2	25-Jun	F	9.059	1	29.4
Calathus	ingratus	KD	7	22-Jul	F	9.372	1	29.4
Calathus	ingratus	KD	2	22-Jul	M	7.738	1	29.4
Calathus	ingratus	KD	2	22-Jul	F	9.03	1	29.4
Calathus	ingratus	KD	2	22-Jul	F	8.459	1	29.4
Calathus	ingratus	KD	2	22-Jul	F	8.979	1	29.4
Calathus	ingratus	KS	8	9-Jul	F	9.191	1	3.4
Calathus	ingratus	KS	5	9-Jul	F	9.213	1	3.4
Calathus	ingratus	KS	5	9-Jul	F	8.282	1	3.4
Calathus	ingratus	KS	5	9-Jul	F	7.918	1	3.4
Calathus	ingratus	KS	5	9-Jul	F	8.299	1	3.4
Calathus	ingratus	KS	5	9-Jul	F	7.539	1	3.4
Calathus	ingratus	KS	5	9-Jul	F	8.93	1	3.4
Calathus	ingratus	KS	5	9-Jul	M	8.294	1	3.4
Calathus	ingratus	KS	5	9-Jul	M	7.943	1	3.4
Calathus	ingratus	KS	5	9-Jul	M	7.82	1	3.4
Calathus	ingratus	KS	7	9-Jul	M	8.245	1	3.4
Calathus	ingratus	KS	7	9-Jul	F	8.751	1	3.4
Calathus	ingratus	KS	2	9-Jul	M	8.038	1	3.4
Calathus	ingratus	KS	2	9-Jul	F	7.902	1	3.4
Calathus	ingratus	KS	2	9-Jul	F	8.773	1	3.4
Calathus	ingratus	KS	2	9-Jul	F	8.337	1	3.4
Calathus	ingratus	KS	2	9-Jul	F	8.221	1	3.4
Calathus	ingratus	KS	7	27-Jun	F	8.48	1	3.4
Calathus	ingratus	KS	4	27-Jun	M	8.76	1	3.4
Calathus	ingratus	KS	4	27-Jun	M	8.454	1	3.4
Calathus	ingratus	KS	4	27-Jun	M	8.436	1	3.4
Calathus	ingratus	KS	4	27-Jun	M	8.376	1	3.4
Calathus	ingratus	KS	4	27-Jun	F	8.636	1	3.4
Calathus	ingratus	KS	4	27-Jun	F	9.135	1	3.4
Calathus	ingratus	KS	4	27-Jun	F	9.055	1	3.4
Calathus	ingratus	KS	4	27-Jun	F	8.504	1	3.4
Calathus	ingratus	KS	8	27-Jun	M	8.435	1	3.4
Calathus	ingratus	KS	6	9-Jul	F	9.619	1	3.4
Calathus	ingratus	KS	6	9-Jul	M	7.78	1	3.4
Calathus	ingratus	KS	6	9-Jul	M	7.842	1	3.4
Calathus	ingratus	KS	6	9-Jul	M	8.424	1	3.4
Calathus	ingratus	KS	6	9-Jul	M	7.946	1	3.4
Calathus	ingratus	KS	8	23-Jul	M	9.009	1	3.4
Calathus	ingratus	KS	8	23-Jul	M	7.948	1	3.4
Calathus	ingratus	KS	8	23-Jul	M	8.093	1	3.4
Calathus	ingratus	KS	8	23-Jul	M	8.79	1	3.4
Calathus	ingratus	KS	8	23-Jul	M	8.277	1	3.4
Calathus	ingratus	KS	8	23-Jul	M	8.56	1	3.4
Calathus	ingratus	KS	8	23-Jul	M	9.422	1	3.4
Calathus	ingratus	KS	8	23-Jul	M	7.713	1	3.4
Calathus	ingratus	KS	8	23-Jul	F	8.773	1	3.4
Calathus	ingratus	KS	8	23-Jul	F	8.21	1	3.4
Calathus	ingratus	KS	4	8-Aug	M	8.743	1	3.4
Calathus	ingratus	LG	1	5-Jul	F	9.672	1	0.6
Calathus	ingratus	LG	2	19-Jul	F	8.623	1	0.6
Calathus	ingratus	LG	6	2-Aug	F	8.597	1	0.6
Calathus	ingratus	LG	1	19-Jul	F	8.919	1	0.6
Calathus	ingratus	LG	3	2-Aug	M	8.696	1	0.6
Calathus	ingratus	LG	3	2-Aug	M	8.028	1	0.6
Calathus	ingratus	LG	3	2-Aug	F	8.177	1	0.6
Calathus	ingratus	LG	3	19-Jul	M	8.477	1	0.6
Calathus	ingratus	LG	3	19-Jul	M	7.975	1	0.6
Calathus	ingratus	LG	3	19-Jul	F	8.622	1	0.6
Calathus	ingratus	LO	5	2-Aug	F	8.458	1	15.1
Calathus	ingratus	LO	8	2-Aug	M	8.449	1	15.1
Calathus	ingratus	LO	8	2-Aug	F	8.748	1	15.1
Calathus	ingratus	LO	8	2-Aug	F	8.431	1	15.1
Calathus	ingratus	LO	8	2-Aug	F	8.219	1	15.1
Calathus	ingratus	LO	7	19-Jul	F	8.515	1	15.1
Calathus	ingratus	LO	7	19-Jul	F	8.412	1	15.1
Calathus	ingratus	LO	6	19-Jul	F	8.434	1	15.1
Calathus	ingratus	LO	6	19-Jul	F	8.506	1	15.1
Calathus	ingratus	LO	6	19-Jul	M	8.074	1	15.1
Calathus	ingratus	LO	5	19-Jun	F	8.27	1	15.1
Calathus	ingratus	LO	5	19-Jun	F	8.445	1	15.1
Calathus	ingratus	LO	5	19-Jun	F	8.996	1	15.1
Calathus	ingratus	LO	5	19-Jun	F	8.742	1	15.1
Calathus	ingratus	LO	5	19-Jun	F	9.565	1	15.1
Calathus	ingratus	LO	1	19-Jun	M	9.267	1	15.1
Calathus	ingratus	LO	1	19-Jun	M	8.34	1	15.1
Calathus	ingratus	LO	1	19-Jun	M	7.275	1	15.1
Calathus	ingratus	LO	1	19-Jun	M	8.677	1	15.1
Calathus	ingratus	LO	1	19-Jun	F	8.638	1	15.1
Calathus	ingratus	LO	1	19-Jun	F	6.968	1	15.1
Calathus	ingratus	LO	3	2-Aug	F	9.174	1	15.1
Calathus	ingratus	LO	3	2-Aug	F	8.077	1	15.1
Calathus	ingratus	LO	6	16-Aug	M	8.338	1	15.1
Calathus	ingratus	LO	6	16-Aug	M	8.518	1	15.1
Calathus	ingratus	LO	1	18-Jun	F	9.187	1	15.1
Calathus	ingratus	LO	1	18-Jun	F	8.882	1	15.1
Calathus	ingratus	LO	1	18-Jun	M	7.711	1	15.1
Calathus	ingratus	LO	1	18-Jun	M	7.793	1	15.1
Calathus	ingratus	LO	1	18-Jun	M	8.152	1	15.1
Calathus	ingratus	LO	3	18-Jun	F	8.915	1	15.1
Calathus	ingratus	LO	3	18-Jun	F	8	1	15.1
Calathus	ingratus	LO	5	5-Jul	M	8.422	1	15.1
Calathus	ingratus	LO	5	18-Jun	M	8.074	1	15.1
Calathus	ingratus	LO	2	5-Jul	M	9.014	1	15.1
Calathus	ingratus	LO	2	5-Jul	M	8.861	1	15.1
Calathus	ingratus	LO	2	5-Jul	M	8.613	1	15.1
Calathus	ingratus	LO	2	5-Jul	M	8.423	1	15.1
Calathus	ingratus	LO	3	5-Jul	M	8.364	1	15.1
Calathus	ingratus	LQ	7	5-Jul	M	8.438	1	26.9
Calathus	ingratus	LQ	2	18-Jun	F	8.455	1	26.9
Calathus	ingratus	LV	3	10-Jul	F	8.815	1	169.1
Calathus	ingratus	LV	3	28-Jun	F	8.334	1	169.1
Calathus	ingratus	LV	3	28-Jun	F	8.147	1	169.1
Calathus	ingratus	LV	2	28-Jun	M	7.682	1	169.1
Calathus	ingratus	LZ	4	5-Jul	M	8.575	1	289.2
Calathus	ingratus	LZ	4	5-Jul	M	8.212	1	289.2
Calathus	ingratus	LZ	4	5-Jul	M	8.441	1	289.2
Calathus	ingratus	LZ	4	5-Jul	M	7.434	1	289.2
Calathus	ingratus	LZ	4	5-Jul	F	9.042	1	289.2
Calathus	ingratus	LZ	4	5-Jul	F	8.48	1	289.2
Calathus	ingratus	LZ	4	5-Jul	F	9.583	1	289.2
Calathus	ingratus	LZ	3	5-Jul	F	8.452	1	289.2
Calathus	ingratus	LZ	3	5-Jul	M	8.836	1	289.2
Calathus	ingratus	LZ	3	5-Jul	M	7.9	1	289.2
Calathus	ingratus	LZ	3	5-Jul	M	8.321	1	289.2
Calathus	ingratus	LZ	3	19-Jun	M	8.22	1	289.2
Calathus	ingratus	LZ	2	2-Aug	M	8.404	1	289.2
Calathus	ingratus	LZ	8	16-Aug	M	7.732	1	289.2
Calathus	ingratus	LZ	1	19-Jun	F	9.101	1	289.2
Calathus	ingratus	LZ	7	19-Jun	F	8.317	1	289.2
Calathus	ingratus	LZ	7	19-Jun	M	8.829	1	289.2
Calathus	ingratus	LZ	8	19-Jun	M	8.112	1	289.2
Calathus	ingratus	LZ	8	19-Jun	F	8.996	1	289.2
Calathus	ingratus	LZ	8	19-Jun	F	9.095	1	289.2
Calathus	ingratus	LZ	8	19-Jun	F	8.382	1	289.2
Calathus	ingratus	LZ	2	19-Jun	M	8.229	1	289.2
Calathus	ingratus	LZ	2	19-Jun	M	8.614	1	289.2
Calathus	ingratus	LZ	2	19-Jun	F	8.26	1	289.2
Calathus	ingratus	LZ	8	5-Jul	F	8.814	1	289.2
Calathus	ingratus	LZ	8	5-Jul	F	8.407	1	289.2
Calathus	ingratus	LZ	8	5-Jul	F	9.108	1	289.2
Calathus	ingratus	LZ	8	5-Jul	M	7.394	1	289.2
Calathus	ingratus	LZ	6	5-Jul	F	8.509	1	289.2
Calathus	ingratus	LZ	4	19-Jul	F	8.153	1	289.2
Calathus	ingratus	LZ	4	19-Jul	F	8.873	1	289.2
Calathus	ingratus	LZ	4	19-Jul	M	8.44	1	289.2
Calathus	ingratus	LZ	4	19-Jul	M	8.74	1	289.2
Calathus	ingratus	LZ	4	19-Jul	M	8.037	1	289.2
Calathus	ingratus	LZ	7	19-Jun	F	8.252	1	289.2
Calathus	ingratus	LZ	7	19-Jun	M	8.983	1	289.2
Calathus	ingratus	MT	1	13-Aug	M	8.134	1	7.5
Calathus	ingratus	MT	1	13-Aug	M	8.246	1	7.5
Calathus	ingratus	MT	1	13-Aug	F	8.664	1	7.5
Calathus	ingratus	MT	1	13-Aug	F	7.973	1	7.5
Calathus	ingratus	MT	2	3-Jul	M	8.085	1	7.5
Calathus	ingratus	MT	2	3-Jul	M	8.589	1	7.5
Calathus	ingratus	MT	2	3-Jul	M	8.363	1	7.5
Calathus	ingratus	MT	4	3-Jul	M	8.146	1	7.5
Calathus	ingratus	MT	6	3-Jul	M	8.089	1	7.5
Calathus	ingratus	MT	6	3-Jul	F	8.13	1	7.5
Calathus	ingratus	MT	6	3-Jul	F	8.978	1	7.5
Calathus	ingratus	MT	3	3-Jul	M	7.643	1	7.5
Calathus	ingratus	MT	1	3-Jul	F	8.529	1	7.5
Calathus	ingratus	MT	1	3-Jul	M	8.566	1	7.5
Calathus	ingratus	MT	3	19-Jun	F	8.89	1	7.5
Calathus	ingratus	MT	2	19-Jun	M	7.561	1	7.5
Calathus	ingratus	MT	2	19-Jun	M	8.347	1	7.5
Calathus	ingratus	MT	2	19-Jun	M	8.353	1	7.5
Calathus	ingratus	MT	2	19-Jun	M	7.992	1	7.5
Calathus	ingratus	MT	2	19-Jun	M	7.962	1	7.5
Calathus	ingratus	MT	2	19-Jun	M	8.024	1	7.5
Calathus	ingratus	MT	2	19-Jun	M	7.963	1	7.5
Calathus	ingratus	MT	2	19-Jun	M	8.635	1	7.5
Calathus	ingratus	MT	2	19-Jun	M	8.139	1	7.5
Calathus	ingratus	MT	2	19-Jun	M	7.805	1	7.5
Calathus	ingratus	MT	2	19-Jun	F	8.452	1	7.5
Calathus	ingratus	MT	2	19-Jun	F	8.675	1	7.5
Calathus	ingratus	MT	2	19-Jun	F	8.655	1	7.5
Calathus	ingratus	MT	2	19-Jun	F	7.575	1	7.5
Calathus	ingratus	MT	6	19-Jun	F	9.29	1	7.5
Calathus	ingratus	MT	6	19-Jun	F	7.983	1	7.5
Calathus	ingratus	MT	6	19-Jun	F	8.599	1	7.5
Calathus	ingratus	MT	6	19-Jun	M	8.724	1	7.5
Calathus	ingratus	MT	2	3-Jul	F	8.158	1	7.5
Calathus	ingratus	MT	2	19-Jun	F	8.817	1	7.5
Calathus	ingratus	MT	2	19-Jun	F	8.799	1	7.5
Calathus	ingratus	MT	2	19-Jun	F	8.799	1	7.5
Calathus	ingratus	NC	7	4-Jul	F	8.053	1	19.3
Calathus	ingratus	NC	8	1-Aug	M	9.245	1	19.3
Calathus	ingratus	NT	5	4-Jul	F	8.081	1	43.2
Calathus	ingratus	RB	4	4-Jul	M	7.815	1	2.5
Calathus	ingratus	RB	4	4-Jul	M	7.485	1	2.5
Calathus	ingratus	RB	3	4-Jul	F	9.154	1	2.5
Calathus	ingratus	RB	5	4-Jul	M	7.444	1	2.5
Calathus	ingratus	RB	6	4-Jul	M	8.589	1	2.5
Calathus	ingratus	RB	6	4-Jul	M	8.228	1	2.5
Calathus	ingratus	RB	6	4-Jul	M	7.761	1	2.5
Calathus	ingratus	RB	4	4-Jul	M	8.037	1	2.5
Calathus	ingratus	RB	4	4-Jul	M	8.002	1	2.5
Calathus	ingratus	RB	3	17-Jul	F	8.175	1	2.5
Calathus	ingratus	RB	3	17-Jul	F	8.821	1	2.5
Calathus	ingratus	RB	3	17-Jul	M	8.306	1	2.5
Calathus	ingratus	RB	3	17-Jul	M	8.682	1	2.5
Calathus	ingratus	RB	3	17-Jul	M	8.879	1	2.5
Calathus	ingratus	RB	3	17-Jul	M	8.602	1	2.5
Calathus	ingratus	RB	3	17-Jul	M	7.848	1	2.5
Calathus	ingratus	RB	3	17-Jul	M	8.44	1	2.5
Calathus	ingratus	RB	6	17-Jul	M	8.744	1	2.5
Calathus	ingratus	RB	6	17-Jul	M	8.481	1	2.5
Calathus	ingratus	RB	6	17-Jul	M	8.602	1	2.5
Calathus	ingratus	RB	6	17-Jul	F	9.149	1	2.5
Calathus	ingratus	RB	6	17-Jul	F	8.432	1	2.5
Calathus	ingratus	RB	6	17-Jul	F	9.073	1	2.5
Calathus	ingratus	RB	6	17-Jul	F	8.489	1	2.5
Calathus	ingratus	RB	6	17-Jul	F	9.192	1	2.5
Calathus	ingratus	RB	1	17-Jul	F	9.205	1	2.5
Calathus	ingratus	RB	1	17-Jul	F	8.145	1	2.5
Calathus	ingratus	RB	1	17-Jul	M	8.829	1	2.5
Calathus	ingratus	RB	3	1-Aug	F	9.169	1	2.5
Calathus	ingratus	RB	3	1-Aug	F	8.405	1	2.5
Calathus	ingratus	RB	3	1-Aug	F	8.357	1	2.5
Calathus	ingratus	RB	3	1-Aug	M	7.837	1	2.5
Calathus	ingratus	RB	3	1-Aug	M	8.432	1	2.5
Calathus	ingratus	RB	3	1-Aug	M	7.87	1	2.5
Calathus	ingratus	RB	1	1-Aug	M	8.554	1	2.5
Calathus	ingratus	RB	1	1-Aug	M	9.441	1	2.5
Calathus	ingratus	RB	1	1-Aug	F	9.627	1	2.5
Calathus	ingratus	RB	1	1-Aug	F	8.431	1	2.5
Calathus	ingratus	RI	6	9-Aug	M	9.778	1	1.6
Calathus	ingratus	RI	6	9-Aug	M	8.011	1	1.6
Calathus	ingratus	RI	6	9-Aug	F	9.262	1	1.6
Calathus	ingratus	RI	6	9-Aug	F	7.796	1	1.6
Calathus	ingratus	RI	4	28-Jun	M	8.458	1	1.6
Calathus	ingratus	RI	1	10-Jul	F	8.357	1	1.6
Calathus	ingratus	RI	1	10-Jul	M	8.308	1	1.6
Calathus	ingratus	RI	8	10-Jul	M	8.539	1	1.6
Calathus	ingratus	RI	8	10-Jul	M	8.497	1	1.6
Calathus	ingratus	RI	7	10-Jul	M	8.49	1	1.6
Calathus	ingratus	RI	7	10-Jul	M	8.774	1	1.6
Calathus	ingratus	RI	7	10-Jul	M	8.679	1	1.6
Calathus	ingratus	RI	7	10-Jul	M	8.599	1	1.6
Calathus	ingratus	RI	6	25-Jul	F	9.301	1	1.6
Calathus	ingratus	RI	6	25-Jul	F	8.38	1	1.6
Calathus	ingratus	RI	6	25-Jul	F	8.416	1	1.6
Calathus	ingratus	RI	6	25-Jul	M	8.38	1	1.6
Calathus	ingratus	RI	6	25-Jul	M	8.836	1	1.6
Calathus	ingratus	RI	6	25-Jul	M	8.638	1	1.6
Calathus	ingratus	RI	4	25-Jul	M	8.46	1	1.6
Calathus	ingratus	RI	4	25-Jul	M	8.451	1	1.6
Calathus	ingratus	RI	4	25-Jul	M	8.007	1	1.6
Calathus	ingratus	RI	4	25-Jul	F	8.052	1	1.6
Calathus	ingratus	RI	4	25-Jul	F	8.566	1	1.6
Calathus	ingratus	RI	4	25-Jul	F	8.733	1	1.6
Calathus	ingratus	RI	4	25-Jul	F	9.23	1	1.6
Calathus	ingratus	RI	1	25-Jul	F	8.854	1	1.6
Calathus	ingratus	RI	1	25-Jul	F	8.319	1	1.6
Calathus	ingratus	RI	1	25-Jul	M	8.958	1	1.6
Calathus	ingratus	RI	1	25-Jul	M	8.973	1	1.6
Calathus	ingratus	RI	1	25-Jul	M	8.994	1	1.6
Calathus	ingratus	RI	1	25-Jul	M	8.101	1	1.6
Calathus	ingratus	RI	1	25-Jul	M	8.427	1	1.6
Calathus	ingratus	RI	1	25-Jul	M	8.444	1	1.6
Calathus	ingratus	RI	1	9-Aug	F	9.167	1	1.6
Calathus	ingratus	RI	1	9-Aug	F	8.237	1	1.6
Calathus	ingratus	RI	1	9-Aug	F	9.064	1	1.6
Calathus	ingratus	RI	1	9-Aug	F	9.08	1	1.6
Calathus	ingratus	ROSS	7	17-Jun	F	9.019	1	534.8
Calathus	ingratus	ROSS	7	2-Jul	M	8.414	1	534.8
Calathus	ingratus	ROSS	1	2-Jul	M	8.359	1	534.8
Calathus	ingratus	ROSS	1	2-Jul	M	8.464	1	534.8
Calathus	ingratus	ROSS	1	2-Jul	M	7.682	1	534.8
Calathus	ingratus	ROSS	1	2-Jul	F	8.977	1	534.8
Calathus	ingratus	ROSS	7	2-Jul	F	8.028	1	534.8
Calathus	ingratus	ROSS	7	2-Jul	M	8.632	1	534.8
Calathus	ingratus	ROSS	7	29-Jul	F	8.903	1	534.8
Calathus	ingratus	ROSS	7	29-Jul	F	8.864	1	534.8
Calathus	ingratus	ROSS	4	2-Jul	M	8.822	1	534.8
Calathus	ingratus	ROSS	7	16-Jul	F	8.202	1	534.8
Calathus	ingratus	ROSS	7	16-Jul	M	8.328	1	534.8
Calathus	ingratus	ROSS	7	16-Jul	M	8.384	1	534.8
Calathus	ingratus	SD	7	9-Jul	F	8.751	1	8.2
Calathus	ingratus	SD	8	9-Jul	M	8.484	1	8.2
Calathus	ingratus	SD	8	9-Jul	M	9.458	1	8.2
Calathus	ingratus	SD	8	9-Jul	M	8.171	1	8.2
Calathus	ingratus	SD	2	23-Jul	F	8.3	1	8.2
Calathus	ingratus	SD	2	23-Jul	M	7.496	1	8.2
Calathus	ingratus	SD	2	9-Jul	F	9.287	1	8.2
Calathus	ingratus	SD	2	9-Jul	F	8.597	1	8.2
Calathus	ingratus	SD	2	9-Jul	M	8.49	1	8.2
Calathus	ingratus	SD	2	9-Jul	M	8.9	1	8.2
Calathus	ingratus	SD	2	9-Jul	M	7.72	1	8.2
Calathus	ingratus	SD	4	27-Jun	M	9.25	1	8.2
Calathus	ingratus	SD	8	23-Jul	F	8.709	1	8.2
Calathus	ingratus	SD	8	23-Jul	M	8.433	1	8.2
Calathus	ingratus	SD	8	23-Jul	M	8.873	1	8.2
Calathus	ingratus	SD	8	23-Jul	M	7.694	1	8.2
Calathus	ingratus	SD	8	23-Jul	M	8.275	1	8.2
Calathus	ingratus	SD	8	23-Jul	M	8.522	1	8.2
Calathus	ingratus	SD	8	23-Jul	M	9.114	1	8.2
Calathus	ingratus	SD	8	23-Jul	M	8.328	1	8.2
Calathus	ingratus	SD	8	23-Jul	M	8.172	1	8.2
Calathus	ingratus	SD	8	23-Jul	M	8.415	1	8.2
Calathus	ingratus	SD	8	23-Jul	M	8.937	1	8.2
Calathus	ingratus	SD	8	23-Jul	M	9.207	1	8.2
Calathus	ingratus	SD	8	23-Jul	M	8.993	1	8.2
Calathus	ingratus	SD	8	23-Jul	M	8.833	1	8.2
Calathus	ingratus	SD	6	27-Jun	F	9.184	1	8.2
Calathus	ingratus	SD	6	27-Jun	F	8.515	1	8.2
Calathus	ingratus	SD	5	27-Jun	F	9.32	1	8.2
Calathus	ingratus	SD	5	9-Jul	F	8.857	1	8.2
Calathus	ingratus	SD	5	9-Jul	F	7.914	1	8.2
Calathus	ingratus	SD	6	9-Jul	F	8.521	1	8.2
Calathus	ingratus	SD	6	9-Jul	F	8.422	1	8.2
Calathus	ingratus	SD	2	9-Jul	F	9.186	1	8.2
Calathus	ingratus	SD	2	9-Jul	F	8.429	1	8.2
Calathus	ingratus	TB	8	17-Jun	F	8.952	1	19.5
Calathus	ingratus	TB	8	17-Jun	F	8.793	1	19.5
Calathus	ingratus	TB	5	1-Aug	F	9.176	1	19.5
Calathus	ingratus	TB	5	1-Aug	F	9.099	1	19.5
Calathus	ingratus	TB	3	4-Jul	M	7.512	1	19.5
Calathus	ingratus	TB	3	4-Jul	M	8.007	1	19.5
Calathus	ingratus	TB	3	4-Jul	M	8.063	1	19.5
Calathus	ingratus	TB	3	4-Jul	M	7.58	1	19.5
Calathus	ingratus	TB	4	4-Jul	M	7.859	1	19.5
Calathus	ingratus	TB	4	4-Jul	M	8.231	1	19.5
Calathus	ingratus	TB	4	4-Jul	M	8.217	1	19.5
Calathus	ingratus	TB	4	4-Jul	M	8.717	1	19.5
Calathus	ingratus	TB	4	4-Jul	M	8.261	1	19.5
Calathus	ingratus	TB	4	4-Jul	M	8.556	1	19.5
Calathus	ingratus	TB	4	4-Jul	M	8.689	1	19.5
Calathus	ingratus	TB	4	4-Jul	M	8.415	1	19.5
Calathus	ingratus	TB	4	4-Jul	M	8.247	1	19.5
Calathus	ingratus	TB	4	4-Jul	M	8.317	1	19.5
Calathus	ingratus	TB	1	4-Jul	M	8.764	1	19.5
Calathus	ingratus	TB	1	4-Jul	M	8.207	1	19.5
Calathus	ingratus	TB	1	4-Jul	F	9.068	1	19.5
Calathus	ingratus	TB	2	4-Jul	F	8.967	1	19.5
Calathus	ingratus	TB	2	4-Jul	F	9.237	1	19.5
Calathus	ingratus	TB	2	1-Aug	F	9.294	1	19.5
Calathus	ingratus	TB	2	1-Aug	F	8.881	1	19.5
Calathus	ingratus	TB	2	1-Aug	M	7.563	1	19.5
Calathus	ingratus	TB	6	15-Aug	M	7.922	1	19.5
Calathus	ingratus	TB	6	15-Aug	M	7.695	1	19.5
Calathus	ingratus	TB	6	15-Aug	M	8.179	1	19.5
Calathus	ingratus	TB	6	15-Aug	F	8.276	1	19.5
Calathus	ingratus	TB	6	15-Aug	F	7.365	1	19.5
Calathus	ingratus	TB	6	15-Aug	F	8.238	1	19.5
Calathus	ingratus	TB	6	15-Aug	F	7.821	1	19.5
Calathus	ingratus	TB	6	15-Aug	F	8.691	1	19.5
Calathus	ingratus	TB	8	4-Jul	F	8.583	1	19.5
Calathus	ingratus	TB	4	1-Aug	F	9.654	1	19.5
Calathus	ingratus	TB	4	1-Aug	F	8.151	1	19.5
Calathus	ingratus	TB	4	1-Aug	F	9.109	1	19.5
Calathus	ingratus	TB	6	1-Aug	F	8.979	1	19.5
Calathus	ingratus	TB	6	1-Aug	F	8.502	1	19.5
Calathus	ingratus	UK	6	17-Jun	M	9.143	1	124.3
Calathus	ingratus	UK	3	2-Jul	F	8.456	1	124.3
Calathus	ingratus	UK	4	2-Jul	F	7.999	1	124.3
Calathus	ingratus	UK	4	2-Jul	F	8.188	1	124.3
Calathus	ingratus	UK	5	2-Jul	M	7.634	1	124.3
Calathus	ingratus	UK	5	2-Jul	M	7.426	1	124.3
Calathus	ingratus	UK	5	2-Jul	M	7.59	1	124.3
Calathus	ingratus	UK	5	2-Jul	F	8.807	1	124.3
Calathus	ingratus	UK	5	2-Jul	F	8.627	1	124.3
Calathus	ingratus	UK	5	2-Jul	F	8.644	1	124.3
Calathus	ingratus	UK	2	2-Jul	M	7.925	1	124.3
Calathus	ingratus	UK	5	17-Jun	F	8.847	1	124.3
Calathus	ingratus	UK	5	17-Jun	F	8.333	1	124.3
Calathus	ingratus	UK	5	17-Jun	F	9.064	1	124.3
Calathus	ingratus	UK	5	17-Jun	F	8.302	1	124.3
Calathus	ingratus	UK	5	17-Jun	M	8.59	1	124.3
Calathus	ingratus	UK	7	17-Jun	F	9.552	1	124.3
Calathus	ingratus	UK	7	17-Jun	F	7.973	1	124.3
Calathus	ingratus	UK	7	17-Jun	F	8.686	1	124.3
Calathus	ingratus	UK	7	17-Jun	M	7.825	1	124.3
Calathus	ingratus	UK	8	16-Jul	M	8.203	1	124.3
Calathus	ingratus	UK	8	16-Jul	F	9.149	1	124.3
Calathus	ingratus	UK	8	16-Jul	F	8.249	1	124.3
Calathus	ingratus	UK	6	17-Jun	M	8.251	1	124.3
Calathus	ingratus	UK	6	17-Jun	M	9.16	1	124.3
Calathus	ingratus	UK	3	29-Jul	F	8.813	1	124.3
Calathus	ingratus	UK	3	29-Jul	F	8.487	1	124.3
Calathus	ingratus	UK	3	29-Jul	F	8.539	1	124.3
Calathus	ingratus	UK	3	29-Jul	F	9.6	1	124.3
Calathus	ingratus	UK	3	29-Jul	F	8.7	1	124.3
Calathus	ingratus	UK	3	29-Jul	M	8.104	1	124.3
Calathus	ingratus	UK	3	29-Jul	M	8.717	1	124.3
Calathus	ingratus	UK	3	29-Jul	M	8.869	1	124.3
Calathus	ingratus	UK	3	29-Jul	M	8.464	1	124.3
Calathus	ingratus	UK	2	12-Aug	M	7.786	1	124.3
Calathus	ingratus	UK	2	12-Aug	M	8.885	1	124.3
Calathus	ingratus	UK	2	12-Aug	M	8.744	1	124.3
Calathus	ingratus	UK	2	12-Aug	M	8.943	1	124.3
Carabus	chamissonis	AL	5	8-Jul	F	18.347	1	0.7
Carabus	chamissonis	AL	5	8-Jul	F	18.758	1	0.7
Carabus	chamissonis	AL	1	8-Jul	F	18.866	1	0.7
Carabus	chamissonis	AL	3	8-Jul	F	17.54	1	0.7
Carabus	chamissonis	AL	7	8-Jul	F	18.463	1	0.7
Carabus	chamissonis	AL	7	8-Jul	F	18.751	1	0.7
Carabus	chamissonis	AL	7	8-Jul	M	17.119	1	0.7
Carabus	chamissonis	AL	5	8-Jul	M	17.128	1	0.7
Carabus	chamissonis	AL	7	25-Jun	M	16.65	1	0.7
Carabus	chamissonis	AL	7	25-Jun	M	18.646	1	0.7
Carabus	chamissonis	AL	7	25-Jun	M	17.507	1	0.7
Carabus	chamissonis	AL	7	25-Jun	M	17.775	1	0.7
Carabus	chamissonis	AL	7	25-Jun	F	18.435	1	0.7
Carabus	chamissonis	AL	4	25-Jun	M	18.066	1	0.7
Carabus	chamissonis	AL	4	25-Jun	F	18.752	1	0.7
Carabus	chamissonis	AL	5	25-Jun	M	17.637	1	0.7
Carabus	chamissonis	AL	5	25-Jun	M	18.377	1	0.7
Carabus	chamissonis	AL	5	25-Jun	M	18.085	1	0.7
Carabus	chamissonis	AL	5	25-Jun	M	18.034	1	0.7
Carabus	chamissonis	AL	5	25-Jun	F	19.195	1	0.7
Carabus	chamissonis	AL	5	25-Jun	F	17.702	1	0.7
Carabus	chamissonis	AL	6	25-Jun	M	17.085	1	0.7
Carabus	chamissonis	AL	6	25-Jun	M	16.879	1	0.7
Carabus	chamissonis	AL	6	25-Jun	M	17.922	1	0.7
Carabus	chamissonis	AL	6	25-Jun	M	17.725	1	0.7
Carabus	chamissonis	AL	6	25-Jun	F	18.355	1	0.7
Carabus	chamissonis	AL	6	25-Jun	F	18.861	1	0.7
Carabus	chamissonis	AL	3	25-Jun	M	16.867	1	0.7
Carabus	chamissonis	AL	1	25-Jun	F	18.295	1	0.7
Carabus	chamissonis	AL	7	19-Aug	F	17.517	1	0.7
Carabus	chamissonis	BI	4	28-Jun	F	18.876	1	980.7
Carabus	chamissonis	BI	1	23-Aug	F	18.941	1	980.7
Carabus	chamissonis	BI	1	23-Aug	F	17.9	1	980.7
Carabus	chamissonis	BI	3	23-Aug	M	16.907	1	980.7
Carabus	chamissonis	BI	2	23-Aug	F	17.652	1	980.7
Carabus	chamissonis	BI	8	28-Jun	F	19.552	1	980.7
Carabus	chamissonis	BI	3	28-Jun	F	18.013	1	980.7
Carabus	chamissonis	BI	1	28-Jun	M	17.149	1	980.7
Carabus	chamissonis	BI	2	27-Jun	F	17.953	1	3.4
Carabus	chamissonis	BR	7	9-Jul	F	18.327	1	255.1
Carabus	chamissonis	BR	5	9-Jul	F	17.898	1	255.1
Carabus	chamissonis	BR	5	9-Jul	F	18.769	1	255.1
Carabus	chamissonis	BR	7	8-Aug	M	16.795	1	255.1
Carabus	chamissonis	BR	6	8-Aug	M	16.097	1	255.1
Carabus	chamissonis	BR	2	23-Jul	F	18.343	1	255.1
Carabus	chamissonis	BR	5	8-Aug	M	18.901	1	255.1
Carabus	chamissonis	BR	1	22-Aug	M	16.588	1	255.1
Carabus	chamissonis	BR	6	22-Aug	F	19.207	1	255.1
Carabus	chamissonis	BR	6	27-Jun	F	18.792	1	255.1
Carabus	chamissonis	BR	6	27-Jun	F	17.308	1	255.1
Carabus	chamissonis	BR	3	27-Jun	M	17.818	1	255.1
Carabus	chamissonis	BR	3	27-Jun	F	18.729	1	255.1
Carabus	chamissonis	BR	3	27-Jun	F	18.516	1	255.1
Carabus	chamissonis	BR	5	27-Jun	F	18.818	1	255.1
Carabus	chamissonis	BR	1	27-Jun	F	18.229	1	255.1
Carabus	chamissonis	BR	1	27-Jun	F	18.644	1	255.1
Carabus	chamissonis	BR	1	27-Jun	F	18.64	1	255.1
Carabus	chamissonis	BR	1	27-Jun	F	19.026	1	255.1
Carabus	chamissonis	BR	1	27-Jun	F	19.484	1	255.1
Carabus	chamissonis	BR	1	27-Jun	F	18.427	1	255.1
Carabus	chamissonis	BR	1	27-Jun	F	19.714	1	255.1
Carabus	chamissonis	BR	1	27-Jun	M	17.097	1	255.1
Carabus	chamissonis	BR	1	27-Jun	M	17.794	1	255.1
Carabus	chamissonis	BR	1	27-Jun	M	18.432	1	255.1
Carabus	chamissonis	BR	7	27-Jun	F	19.295	1	255.1
Carabus	chamissonis	BR	7	27-Jun	F	18.128	1	255.1
Carabus	chamissonis	BR	7	27-Jun	F	18.4	1	255.1
Carabus	chamissonis	BR	7	27-Jun	F	19.312	1	255.1
Carabus	chamissonis	BR	7	27-Jun	M	17.739	1	255.1
Carabus	chamissonis	BR	7	27-Jun	M	16.654	1	255.1
Carabus	chamissonis	BR	4	27-Jun	M	16.851	1	255.1
Carabus	chamissonis	BR	4	27-Jun	M	17.345	1	255.1
Carabus	chamissonis	BR	4	27-Jun	F	19.991	1	255.1
Carabus	chamissonis	BR	4	27-Jun	F	18.618	1	255.1
Carabus	chamissonis	BR	8	27-Jun	F	18.897	1	255.1
Carabus	chamissonis	BR	8	27-Jun	F	18.115	1	255.1
Carabus	chamissonis	BR	8	27-Jun	F	18.791	1	255.1
Carabus	chamissonis	BR	8	27-Jun	F	19.85	1	255.1
Carabus	chamissonis	BR	8	27-Jun	F	18.923	1	255.1
Carabus	chamissonis	BR	4	9-Jul	M	17.131	1	255.1
Carabus	chamissonis	CC	2	19-Jun	F	18.597	1	21.1
Carabus	chamissonis	CC	2	19-Jun	M	16.382	1	21.1
Carabus	chamissonis	CC	2	19-Jun	M	17.49	1	21.1
Carabus	chamissonis	CD	5	18-Jun	F	17.792	1	3.2
Carabus	chamissonis	CD	5	18-Jun	M	18.593	1	3.2
Carabus	chamissonis	CD	5	18-Jun	M	17.326	1	3.2
Carabus	chamissonis	CD	5	18-Jun	M	17.268	1	3.2
Carabus	chamissonis	CD	5	18-Jun	M	18.027	1	3.2
Carabus	chamissonis	CD	5	18-Jun	M	17.461	1	3.2
Carabus	chamissonis	CD	7	18-Jun	F	18.265	1	3.2
Carabus	chamissonis	CD	7	18-Jun	F	18.914	1	3.2
Carabus	chamissonis	CD	7	18-Jun	F	19.535	1	3.2
Carabus	chamissonis	CD	7	18-Jun	F	18.459	1	3.2
Carabus	chamissonis	CD	4	18-Jun	M	17.292	1	3.2
Carabus	chamissonis	CD	4	18-Jun	F	18.603	1	3.2
Carabus	chamissonis	CD	4	18-Jun	F	17.651	1	3.2
Carabus	chamissonis	CD	4	18-Jun	F	19.319	1	3.2
Carabus	chamissonis	CD	5	18-Jun	M	18.464	1	3.2
Carabus	chamissonis	CD	5	18-Jun	M	17.67	1	3.2
Carabus	chamissonis	CD	1	18-Jun	M	18.02	1	3.2
Carabus	chamissonis	CD	6	18-Jun	M	18.142	1	3.2
Carabus	chamissonis	CD	6	18-Jun	F	18.078	1	3.2
Carabus	chamissonis	CD	3	18-Jun	F	19.096	1	3.2
Carabus	chamissonis	CD	8	18-Jun	M	17.928	1	3.2
Carabus	chamissonis	CD	4	5-Jul	M	17.741	1	3.2
Carabus	chamissonis	CD	2	5-Jul	F	18.758	1	3.2
Carabus	chamissonis	CD	2	5-Jul	F	17.863	1	3.2
Carabus	chamissonis	CD	6	5-Jul	M	16.683	1	3.2
Carabus	chamissonis	CD	6	5-Jul	F	19.317	1	3.2
Carabus	chamissonis	CD	3	5-Jul	F	18.537	1	3.2
Carabus	chamissonis	CD	3	5-Jul	M	18.043	1	3.2
Carabus	chamissonis	CD	5	5-Jul	F	18.811	1	3.2
Carabus	chamissonis	CD	5	5-Jul	F	19.063	1	3.2
Carabus	chamissonis	CD	5	5-Jul	F	19.468	1	3.2
Carabus	chamissonis	CD	5	5-Jul	F	18.996	1	3.2
Carabus	chamissonis	CD	5	5-Jul	F	19.155	1	3.2
Carabus	chamissonis	CD	5	5-Jul	F	18.005	1	3.2
Carabus	chamissonis	CD	5	5-Jul	M	18.464	1	3.2
Carabus	chamissonis	CD	5	5-Jul	M	17.914	1	3.2
Carabus	chamissonis	CD	5	5-Jul	M	15.404	1	3.2
Carabus	chamissonis	CD	4	19-Jul	M	17.188	1	3.2
Carabus	chamissonis	CI	6	27-Jun	F	18.398	1	1.2
Carabus	chamissonis	DG	5	13-Aug	F	18.487	1	10.3
Carabus	chamissonis	DG	7	3-Jul	F	18.72	1	10.3
Carabus	chamissonis	DG	7	3-Jul	M	17.191	1	10.3
Carabus	chamissonis	DG	7	3-Jul	F	18.142	1	10.3
Carabus	chamissonis	DG	7	3-Jul	M	17.022	1	10.3
Carabus	chamissonis	DG	2	19-Jun	F	19.253	1	10.3
Carabus	chamissonis	DG	5	19-Jun	F	18.656	1	10.3
Carabus	chamissonis	DG	6	19-Jun	M	17.967	1	10.3
Carabus	chamissonis	DG	1	19-Jun	M	17.642	1	10.3
Carabus	chamissonis	DG	1	19-Jun	F	18.398	1	10.3
Carabus	chamissonis	DG	5	18-Jul	F	18.856	1	10.3
Carabus	chamissonis	DG	7	18-Jul	F	19.249	1	10.3
Carabus	chamissonis	FU	8	3-Jul	F	17.912	1	2.6
Carabus	chamissonis	FU	6	3-Jul	M	17.784	1	2.6
Carabus	chamissonis	FU	6	3-Jul	M	17.251	1	2.6
Carabus	chamissonis	FU	6	3-Jul	M	17.862	1	2.6
Carabus	chamissonis	FU	8	3-Jul	F	18.656	1	2.6
Carabus	chamissonis	FU	2	3-Jul	M	18.369	1	2.6
Carabus	chamissonis	FU	7	3-Jul	F	18.582	1	2.6
Carabus	chamissonis	FU	7	3-Jul	M	17.799	1	2.6
Carabus	chamissonis	FU	7	3-Jul	M	17.283	1	2.6
Carabus	chamissonis	FU	8	19-Jun	F	17.723	1	2.6
Carabus	chamissonis	FU	7	19-Jun	M	16.874	1	2.6
Carabus	chamissonis	FU	7	19-Jun	F	18.773	1	2.6
Carabus	chamissonis	FU	6	19-Jun	F	17.155	1	2.6
Carabus	chamissonis	FU	8	18-Jul	F	19.081	1	2.6
Carabus	chamissonis	FU	8	18-Jul	F	17.895	1	2.6
Carabus	chamissonis	GL	6	8-Jul	M	17.807	1	0.7
Carabus	chamissonis	GL	2	19-Aug	M	16.854	1	0.7
Carabus	chamissonis	HB	5	28-Jun	M	16.606	1	0.5
Carabus	chamissonis	JO	8	16-Aug	F	18.188	1	130.2
Carabus	chamissonis	JO	7	16-Aug	F	19.217	1	130.2
Carabus	chamissonis	JO	7	16-Aug	F	18.292	1	130.2
Carabus	chamissonis	JO	7	16-Aug	F	18.196	1	130.2
Carabus	chamissonis	JO	7	16-Aug	M	18.922	1	130.2
Carabus	chamissonis	JO	7	16-Aug	M	17.338	1	130.2
Carabus	chamissonis	JO	7	16-Aug	M	16.917	1	130.2
Carabus	chamissonis	JO	1	16-Aug	M	16.46	1	130.2
Carabus	chamissonis	JO	2	16-Aug	M	17.134	1	130.2
Carabus	chamissonis	JO	2	16-Aug	M	18.172	1	130.2
Carabus	chamissonis	JO	6	16-Aug	F	17.426	1	130.2
Carabus	chamissonis	JO	8	18-Jun	F	19.211	1	130.2
Carabus	chamissonis	JO	8	18-Jun	F	19.22	1	130.2
Carabus	chamissonis	JO	8	18-Jun	F	17.675	1	130.2
Carabus	chamissonis	JO	8	18-Jun	F	19.736	1	130.2
Carabus	chamissonis	JO	8	18-Jun	F	19.568	1	130.2
Carabus	chamissonis	JO	8	18-Jun	F	17.01	1	130.2
Carabus	chamissonis	JO	8	18-Jun	M	16.815	1	130.2
Carabus	chamissonis	JO	8	18-Jun	M	17.778	1	130.2
Carabus	chamissonis	JO	8	18-Jun	M	17.516	1	130.2
Carabus	chamissonis	JO	8	18-Jun	M	17.798	1	130.2
Carabus	chamissonis	JO	8	18-Jun	M	16.549	1	130.2
Carabus	chamissonis	JO	8	18-Jun	M	18.199	1	130.2
Carabus	chamissonis	JO	8	18-Jun	M	17.622	1	130.2
Carabus	chamissonis	JO	8	18-Jun	M	17.599	1	130.2
Carabus	chamissonis	JO	8	18-Jun	M	17.584	1	130.2
Carabus	chamissonis	JO	8	18-Jun	M	17.417	1	130.2
Carabus	chamissonis	JO	8	18-Jun	M	18.221	1	130.2
Carabus	chamissonis	JO	8	18-Jun	M	16.898	1	130.2
Carabus	chamissonis	JO	7	18-Jun	M	17.994	1	130.2
Carabus	chamissonis	JO	7	18-Jun	M	17.97	1	130.2
Carabus	chamissonis	JO	7	18-Jun	M	17.834	1	130.2
Carabus	chamissonis	JO	7	18-Jun	M	18.373	1	130.2
Carabus	chamissonis	JO	7	18-Jun	M	18.142	1	130.2
Carabus	chamissonis	JO	7	18-Jun	F	17.788	1	130.2
Carabus	chamissonis	JO	7	18-Jun	F	16.765	1	130.2
Carabus	chamissonis	JO	7	18-Jun	F	18.519	1	130.2
Carabus	chamissonis	JO	7	18-Jun	F	17.54	1	130.2
Carabus	chamissonis	JO	7	18-Jun	F	18.068	1	130.2
Carabus	chamissonis	JO	7	18-Jun	F	18.318	1	130.2
Carabus	chamissonis	JO	7	18-Jun	F	17.958	1	130.2
Carabus	chamissonis	JO	7	18-Jun	F	19.303	1	130.2
Carabus	chamissonis	JO	7	18-Jun	F	17.414	1	130.2
Carabus	chamissonis	JO	6	18-Jun	M	17.472	1	130.2
Carabus	chamissonis	JO	6	18-Jun	M	16.918	1	130.2
Carabus	chamissonis	JO	6	18-Jun	M	16.857	1	130.2
Carabus	chamissonis	JO	6	18-Jun	M	17.534	1	130.2
Carabus	chamissonis	JO	6	18-Jun	M	17.06	1	130.2
Carabus	chamissonis	JO	6	18-Jun	M	17.275	1	130.2
Carabus	chamissonis	JO	6	18-Jun	M	18.51	1	130.2
Carabus	chamissonis	JO	6	18-Jun	M	17.892	1	130.2
Carabus	chamissonis	JO	6	18-Jun	F	18.961	1	130.2
Carabus	chamissonis	JO	6	18-Jun	F	18.638	1	130.2
Carabus	chamissonis	JO	6	18-Jun	F	19.184	1	130.2
Carabus	chamissonis	JO	6	18-Jun	F	19.507	1	130.2
Carabus	chamissonis	JO	6	18-Jun	F	19.023	1	130.2
Carabus	chamissonis	JO	6	18-Jun	F	17.858	1	130.2
Carabus	chamissonis	JO	6	18-Jun	F	17.942	1	130.2
Carabus	chamissonis	JO	2	18-Jun	F	20.079	1	130.2
Carabus	chamissonis	JO	2	18-Jun	F	19.051	1	130.2
Carabus	chamissonis	JO	2	18-Jun	F	18.792	1	130.2
Carabus	chamissonis	KD	6	25-Jun	F	19.69	1	29.4
Carabus	chamissonis	KD	2	19-Aug	F	17.591	1	29.4
Carabus	chamissonis	KS	8	9-Jul	M	16.669	1	3.4
Carabus	chamissonis	KS	8	9-Jul	F	19.418	1	3.4
Carabus	chamissonis	KS	7	9-Jul	M	18.062	1	3.4
Carabus	chamissonis	KS	7	27-Jun	M	17.392	1	3.4
Carabus	chamissonis	KS	7	27-Jun	M	18.448	1	3.4
Carabus	chamissonis	KS	7	27-Jun	M	17.583	1	3.4
Carabus	chamissonis	KS	7	27-Jun	F	19.067	1	3.4
Carabus	chamissonis	KS	7	27-Jun	F	18.231	1	3.4
Carabus	chamissonis	KS	1	27-Jun	M	16.761	1	3.4
Carabus	chamissonis	KS	4	27-Jun	F	19.796	1	3.4
Carabus	chamissonis	KS	8	27-Jun	M	17.094	1	3.4
Carabus	chamissonis	KS	6	9-Jul	F	18.838	1	3.4
Carabus	chamissonis	KS	6	9-Jul	F	16.801	1	3.4
Carabus	chamissonis	KS	6	9-Jul	M	17.084	1	3.4
Carabus	chamissonis	KS	8	23-Jul	M	16.846	1	3.4
Carabus	chamissonis	KS	8	23-Jul	F	18.243	1	3.4
Carabus	chamissonis	KS	4	8-Aug	F	17.751	1	3.4
Carabus	chamissonis	KS	6	8-Aug	F	19.391	1	3.4
Carabus	chamissonis	KS	4	22-Aug	F	18.083	1	3.4
Carabus	chamissonis	LG	5	5-Jul	M	16.922	1	0.6
Carabus	chamissonis	LG	5	5-Jul	F	19.038	1	0.6
Carabus	chamissonis	LG	5	5-Jul	F	18.451	1	0.6
Carabus	chamissonis	LG	8	5-Jul	M	17.987	1	0.6
Carabus	chamissonis	LG	8	19-Jun	F	18.539	1	0.6
Carabus	chamissonis	LG	8	19-Jun	M	16.392	1	0.6
Carabus	chamissonis	LG	2	19-Jul	F	18.07	1	0.6
Carabus	chamissonis	LG	6	2-Aug	M	16.607	1	0.6
Carabus	chamissonis	LO	6	19-Jul	F	19.015	1	15.1
Carabus	chamissonis	LO	7	19-Jul	F	18.494	1	15.1
Carabus	chamissonis	LO	7	18-Jun	F	17.981	1	15.1
Carabus	chamissonis	LO	6	18-Jun	F	18.234	1	15.1
Carabus	chamissonis	LO	1	18-Jun	F	18.028	1	15.1
Carabus	chamissonis	LO	8	18-Jun	M	16.283	1	15.1
Carabus	chamissonis	LO	8	18-Jun	M	17.963	1	15.1
Carabus	chamissonis	LO	6	18-Jun	M	17.272	1	15.1
Carabus	chamissonis	LO	5	5-Jul	F	17.861	1	15.1
Carabus	chamissonis	LO	5	5-Jul	F	18.68	1	15.1
Carabus	chamissonis	LO	7	5-Jul	F	20.044	1	15.1
Carabus	chamissonis	LO	8	5-Jul	F	16.971	1	15.1
Carabus	chamissonis	LO	8	5-Jul	F	19.326	1	15.1
Carabus	chamissonis	LQ	7	5-Jul	F	18.881	1	26.9
Carabus	chamissonis	LQ	7	5-Jul	F	19.361	1	26.9
Carabus	chamissonis	LQ	8	5-Jul	M	17.697	1	26.9
Carabus	chamissonis	LQ	3	18-Jun	F	18.284	1	26.9
Carabus	chamissonis	LQ	5	16-Aug	F	18.826	1	26.9
Carabus	chamissonis	LV	6	28-Jun	F	18.964	1	169.1
Carabus	chamissonis	LV	6	28-Jun	F	18.133	1	169.1
Carabus	chamissonis	LV	6	28-Jun	F	17.991	1	169.1
Carabus	chamissonis	LV	3	28-Jun	F	19.691	1	169.1
Carabus	chamissonis	LV	7	28-Jun	F	17.368	1	169.1
Carabus	chamissonis	LV	6	28-Jun	F	19.306	1	169.1
Carabus	chamissonis	LV	3	28-Jun	F	18.906	1	169.1
Carabus	chamissonis	LV	3	23-Aug	F	17.485	1	169.1
Carabus	chamissonis	LZ	4	5-Jul	F	18.083	1	289.2
Carabus	chamissonis	LZ	4	5-Jul	F	20.395	1	289.2
Carabus	chamissonis	LZ	7	5-Jul	F	18.209	1	289.2
Carabus	chamissonis	LZ	3	5-Jul	F	18.544	1	289.2
Carabus	chamissonis	LZ	3	19-Jun	F	18.486	1	289.2
Carabus	chamissonis	LZ	3	19-Jun	F	18.506	1	289.2
Carabus	chamissonis	LZ	3	19-Jun	F	18.47	1	289.2
Carabus	chamissonis	LZ	4	19-Jun	M	18.292	1	289.2
Carabus	chamissonis	LZ	4	19-Jun	M	17.272	1	289.2
Carabus	chamissonis	LZ	4	19-Jun	M	17.069	1	289.2
Carabus	chamissonis	LZ	4	19-Jun	M	18.082	1	289.2
Carabus	chamissonis	LZ	4	19-Jun	F	19.337	1	289.2
Carabus	chamissonis	LZ	3	19-Jun	M	17.753	1	289.2
Carabus	chamissonis	LZ	3	19-Jun	F	19.957	1	289.2
Carabus	chamissonis	LZ	1	19-Jun	F	19.271	1	289.2
Carabus	chamissonis	LZ	1	19-Jun	F	18.547	1	289.2
Carabus	chamissonis	LZ	1	19-Jun	F	18.969	1	289.2
Carabus	chamissonis	LZ	7	19-Jun	F	18.39	1	289.2
Carabus	chamissonis	LZ	7	19-Jun	F	18.73	1	289.2
Carabus	chamissonis	LZ	7	19-Jun	F	18.759	1	289.2
Carabus	chamissonis	LZ	7	19-Jun	M	16.51	1	289.2
Carabus	chamissonis	LZ	8	19-Jun	F	17.949	1	289.2
Carabus	chamissonis	LZ	6	19-Jun	F	18.554	1	289.2
Carabus	chamissonis	LZ	2	19-Jun	F	18.935	1	289.2
Carabus	chamissonis	LZ	8	5-Jul	F	19.001	1	289.2
Carabus	chamissonis	LZ	8	5-Jul	F	18.44	1	289.2
Carabus	chamissonis	LZ	8	5-Jul	F	17.779	1	289.2
Carabus	chamissonis	MT	1	13-Aug	M	17.413	1	7.5
Carabus	chamissonis	MT	1	13-Aug	F	18.733	1	7.5
Carabus	chamissonis	MT	4	3-Jul	F	19.52	1	7.5
Carabus	chamissonis	MT	6	3-Jul	M	16.773	1	7.5
Carabus	chamissonis	MT	4	3-Jul	M	18.087	1	7.5
Carabus	chamissonis	MT	3	3-Jul	F	17.964	1	7.5
Carabus	chamissonis	MT	3	3-Jul	M	16.999	1	7.5
Carabus	chamissonis	MT	7	3-Jul	M	17.741	1	7.5
Carabus	chamissonis	MT	1	3-Jul	F	19.001	1	7.5
Carabus	chamissonis	MT	3	19-Jun	M	17.595	1	7.5
Carabus	chamissonis	MT	3	19-Jun	M	17.98	1	7.5
Carabus	chamissonis	MT	3	19-Jun	M	17.73	1	7.5
Carabus	chamissonis	MT	3	19-Jun	M	15.99	1	7.5
Carabus	chamissonis	MT	3	19-Jun	F	19.243	1	7.5
Carabus	chamissonis	MT	3	19-Jun	F	18.403	1	7.5
Carabus	chamissonis	MT	3	19-Jun	F	19.193	1	7.5
Carabus	chamissonis	MT	3	19-Jun	F	19.224	1	7.5
Carabus	chamissonis	MT	3	19-Jun	F	18.859	1	7.5
Carabus	chamissonis	MT	3	19-Jun	F	18.439	1	7.5
Carabus	chamissonis	MT	2	19-Jun	M	18.036	1	7.5
Carabus	chamissonis	MT	2	19-Jun	M	17.27	1	7.5
Carabus	chamissonis	MT	2	19-Jun	M	17.233	1	7.5
Carabus	chamissonis	MT	2	19-Jun	M	16.926	1	7.5
Carabus	chamissonis	MT	2	19-Jun	F	18.685	1	7.5
Carabus	chamissonis	MT	2	19-Jun	F	18.228	1	7.5
Carabus	chamissonis	MT	2	19-Jun	F	18.42	1	7.5
Carabus	chamissonis	MT	2	19-Jun	F	18.592	1	7.5
Carabus	chamissonis	MT	2	19-Jun	F	18.492	1	7.5
Carabus	chamissonis	MT	2	19-Jun	F	18.366	1	7.5
Carabus	chamissonis	MT	2	19-Jun	F	18.541	1	7.5
Carabus	chamissonis	MT	2	19-Jun	F	18.061	1	7.5
Carabus	chamissonis	MT	1	19-Jun	F	17.714	1	7.5
Carabus	chamissonis	MT	1	19-Jun	F	18.901	1	7.5
Carabus	chamissonis	MT	1	19-Jun	M	17.505	1	7.5
Carabus	chamissonis	MT	1	19-Jun	M	17.657	1	7.5
Carabus	chamissonis	MT	1	19-Jun	M	16.536	1	7.5
Carabus	chamissonis	MT	1	19-Jun	M	17.12	1	7.5
Carabus	chamissonis	MT	1	19-Jun	M	17.023	1	7.5
Carabus	chamissonis	MT	1	19-Jun	M	17.747	1	7.5
Carabus	chamissonis	MT	1	19-Jun	M	17.283	1	7.5
Carabus	chamissonis	MT	6	19-Jun	F	19.532	1	7.5
Carabus	chamissonis	MT	6	19-Jun	F	18.325	1	7.5
Carabus	chamissonis	MT	6	19-Jun	F	18.947	1	7.5
Carabus	chamissonis	MT	6	19-Jun	F	18.079	1	7.5
Carabus	chamissonis	MT	6	19-Jun	F	17.54	1	7.5
Carabus	chamissonis	MT	6	19-Jun	M	17.252	1	7.5
Carabus	chamissonis	NC	6	4-Jul	F	18.016	1	19.3
Carabus	chamissonis	NC	8	4-Jul	F	20.069	1	19.3
Carabus	chamissonis	NC	4	4-Jul	F	18.564	1	19.3
Carabus	chamissonis	NC	3	4-Jul	F	18.412	1	19.3
Carabus	chamissonis	NC	6	17-Jun	F	18.927	1	19.3
Carabus	chamissonis	NC	8	17-Jun	F	18.032	1	19.3
Carabus	chamissonis	NC	8	4-Jul	F	18.927	1	19.3
Carabus	chamissonis	NC	3	17-Jun	M	18.146	1	19.3
Carabus	chamissonis	RB	2	17-Jun	F	19.501	1	2.5
Carabus	chamissonis	RB	2	17-Jun	F	18.669	1	2.5
Carabus	chamissonis	RB	2	17-Jun	F	17.848	1	2.5
Carabus	chamissonis	RB	2	17-Jun	F	17.909	1	2.5
Carabus	chamissonis	RB	2	17-Jun	F	17.784	1	2.5
Carabus	chamissonis	RB	2	17-Jun	F	18.515	1	2.5
Carabus	chamissonis	RB	2	17-Jun	M	17.861	1	2.5
Carabus	chamissonis	RB	2	17-Jun	M	16.542	1	2.5
Carabus	chamissonis	RB	2	17-Jun	M	17.081	1	2.5
Carabus	chamissonis	RB	2	17-Jun	M	17.559	1	2.5
Carabus	chamissonis	RB	2	17-Jun	M	18.084	1	2.5
Carabus	chamissonis	RB	2	17-Jun	M	17.283	1	2.5
Carabus	chamissonis	RB	2	17-Jun	M	15.258	1	2.5
Carabus	chamissonis	RB	1	4-Jul	F	19.062	1	2.5
Carabus	chamissonis	RB	1	4-Jul	F	17.843	1	2.5
Carabus	chamissonis	RB	1	4-Jul	F	18.457	1	2.5
Carabus	chamissonis	RB	1	4-Jul	F	18.234	1	2.5
Carabus	chamissonis	RB	7	4-Jul	F	18.321	1	2.5
Carabus	chamissonis	RB	7	4-Jul	F	18.445	1	2.5
Carabus	chamissonis	RB	4	4-Jul	F	19.169	1	2.5
Carabus	chamissonis	RB	3	4-Jul	F	17.387	1	2.5
Carabus	chamissonis	RB	3	4-Jul	F	18.862	1	2.5
Carabus	chamissonis	RB	3	4-Jul	M	17.051	1	2.5
Carabus	chamissonis	RB	3	4-Jul	M	17.539	1	2.5
Carabus	chamissonis	RB	5	4-Jul	F	18.185	1	2.5
Carabus	chamissonis	RB	2	4-Jul	M	17.818	1	2.5
Carabus	chamissonis	RB	2	4-Jul	M	17.31	1	2.5
Carabus	chamissonis	RB	2	4-Jul	M	17.172	1	2.5
Carabus	chamissonis	RB	2	4-Jul	M	16.489	1	2.5
Carabus	chamissonis	RB	2	4-Jul	F	18.041	1	2.5
Carabus	chamissonis	RB	2	4-Jul	F	18.805	1	2.5
Carabus	chamissonis	RB	2	4-Jul	F	17.746	1	2.5
Carabus	chamissonis	RB	2	4-Jul	F	19.704	1	2.5
Carabus	chamissonis	RB	2	4-Jul	F	20.042	1	2.5
Carabus	chamissonis	RB	2	4-Jul	F	18.196	1	2.5
Carabus	chamissonis	RB	6	4-Jul	F	18.497	1	2.5
Carabus	chamissonis	RB	6	4-Jul	F	18.351	1	2.5
Carabus	chamissonis	RB	6	4-Jul	F	18.545	1	2.5
Carabus	chamissonis	RB	6	4-Jul	F	16.723	1	2.5
Carabus	chamissonis	RB	6	4-Jul	F	17.833	1	2.5
Carabus	chamissonis	RB	6	4-Jul	M	17.035	1	2.5
Carabus	chamissonis	RB	3	17-Jun	M	17.645	1	2.5
Carabus	chamissonis	RB	3	17-Jun	M	18.301	1	2.5
Carabus	chamissonis	RB	3	17-Jun	M	16.859	1	2.5
Carabus	chamissonis	RB	3	17-Jun	M	17.089	1	2.5
Carabus	chamissonis	RB	3	17-Jun	M	16.803	1	2.5
Carabus	chamissonis	RB	3	17-Jun	M	17.055	1	2.5
Carabus	chamissonis	RB	3	17-Jun	F	16.872	1	2.5
Carabus	chamissonis	RB	3	17-Jun	F	16.864	1	2.5
Carabus	chamissonis	ROSS	7	17-Jun	F	17.097	1	534.8
Carabus	chamissonis	ROSS	7	17-Jun	M	16.046	1	534.8
Carabus	chamissonis	ROSS	1	17-Jun	F	17.93	1	534.8
Carabus	chamissonis	ROSS	1	2-Jul	M	17.254	1	534.8
Carabus	chamissonis	ROSS	1	2-Jul	F	17.262	1	534.8
Carabus	chamissonis	ROSS	1	2-Jul	F	17.862	1	534.8
Carabus	chamissonis	ROSS	1	2-Jul	F	18.783	1	534.8
Carabus	chamissonis	ROSS	1	2-Jul	F	17.606	1	534.8
Carabus	chamissonis	ROSS	7	2-Jul	F	19.265	1	534.8
Carabus	chamissonis	ROSS	6	2-Jul	F	18.917	1	534.8
Carabus	chamissonis	ROSS	1	17-Jun	M	17.929	1	534.8
Carabus	chamissonis	ROSS	7	29-Jul	M	17.045	1	534.8
Carabus	chamissonis	TB	5	1-Aug	F	17.106	1	19.5
Carabus	chamissonis	TB	3	4-Jul	F	16.6	1	19.5
Carabus	chamissonis	TB	3	4-Jul	F	17.964	1	19.5
Carabus	chamissonis	TB	3	4-Jul	F	18.951	1	19.5
Carabus	chamissonis	TB	3	4-Jul	M	16.396	1	19.5
Carabus	chamissonis	TB	5	1-Aug	F	17.648	1	19.5
Carabus	chamissonis	TB	3	4-Jul	M	16.812	1	19.5
Carabus	chamissonis	TB	6	4-Jul	F	17.603	1	19.5
Carabus	chamissonis	TB	6	4-Jul	F	17.177	1	19.5
Carabus	chamissonis	TB	6	4-Jul	M	17.947	1	19.5
Carabus	chamissonis	TB	4	4-Jul	M	16.964	1	19.5
Carabus	chamissonis	TB	4	4-Jul	M	18.324	1	19.5
Carabus	chamissonis	TB	4	4-Jul	M	17.648	1	19.5
Carabus	chamissonis	TB	4	4-Jul	M	16.766	1	19.5
Carabus	chamissonis	TB	4	4-Jul	F	17.519	1	19.5
Carabus	chamissonis	TB	4	4-Jul	F	18.542	1	19.5
Carabus	chamissonis	TB	4	4-Jul	F	17.157	1	19.5
Carabus	chamissonis	TB	1	4-Jul	F	18.807	1	19.5
Carabus	chamissonis	TB	1	4-Jul	F	18.138	1	19.5
Carabus	chamissonis	TB	1	4-Jul	F	18.713	1	19.5
Carabus	chamissonis	TB	2	4-Jul	F	19.126	1	19.5
Carabus	chamissonis	TB	2	4-Jul	F	17.4	1	19.5
Carabus	chamissonis	TB	2	4-Jul	F	17.225	1	19.5
Carabus	chamissonis	TB	2	4-Jul	F	17.836	1	19.5
Carabus	chamissonis	TB	2	4-Jul	M	16.779	1	19.5
Carabus	chamissonis	TB	2	4-Jul	M	16.857	1	19.5
Carabus	chamissonis	TB	5	4-Jul	M	17.062	1	19.5
Carabus	chamissonis	TB	5	4-Jul	M	16.821	1	19.5
Carabus	chamissonis	TB	5	4-Jul	M	17.499	1	19.5
Carabus	chamissonis	TB	5	4-Jul	M	17.551	1	19.5
Carabus	chamissonis	TB	5	4-Jul	F	17.262	1	19.5
Carabus	chamissonis	TB	5	4-Jul	F	16.513	1	19.5
Carabus	chamissonis	TB	5	4-Jul	F	17.755	1	19.5
Carabus	chamissonis	TB	5	4-Jul	F	17.127	1	19.5
Carabus	chamissonis	TB	5	4-Jul	F	18.634	1	19.5
Carabus	chamissonis	TB	5	4-Jul	F	18.417	1	19.5
Carabus	chamissonis	TB	5	4-Jul	F	17.13	1	19.5
Carabus	chamissonis	TB	5	4-Jul	F	18.298	1	19.5
Carabus	chamissonis	TB	5	4-Jul	F	18.225	1	19.5
Carabus	chamissonis	TB	5	17-Jun	M	17.214	1	19.5
Carabus	chamissonis	TB	5	17-Jun	M	16.93	1	19.5
Carabus	chamissonis	TB	5	17-Jun	F	18.031	1	19.5
Carabus	chamissonis	TB	4	17-Jun	M	16.427	1	19.5
Carabus	chamissonis	TB	4	17-Jun	M	17.981	1	19.5
Carabus	chamissonis	TB	6	17-Jun	M	17.127	1	19.5
Carabus	chamissonis	TB	2	1-Aug	M	17.53	1	19.5
Carabus	chamissonis	TB	7	15-Aug	M	17.247	1	19.5
Carabus	chamissonis	TB	6	15-Aug	M	17.516	1	19.5
Carabus	chamissonis	UK	6	17-Jun	F	18.621	1	124.3
Carabus	chamissonis	UK	6	17-Jun	F	18.685	1	124.3
Carabus	chamissonis	UK	6	17-Jun	F	17.965	1	124.3
Carabus	chamissonis	UK	6	17-Jun	M	16.691	1	124.3
Carabus	chamissonis	UK	6	17-Jun	M	17.681	1	124.3
Carabus	chamissonis	UK	1	17-Jun	F	18.173	1	124.3
Carabus	chamissonis	UK	1	17-Jun	F	18.356	1	124.3
Carabus	chamissonis	UK	1	17-Jun	M	16.47	1	124.3
Carabus	chamissonis	UK	8	17-Jun	M	17.513	1	124.3
Carabus	chamissonis	UK	8	17-Jun	M	17.792	1	124.3
Carabus	chamissonis	UK	8	17-Jun	M	18.514	1	124.3
Carabus	chamissonis	UK	8	17-Jun	M	18.321	1	124.3
Carabus	chamissonis	UK	8	17-Jun	F	18.478	1	124.3
Carabus	chamissonis	UK	8	17-Jun	F	18.526	1	124.3
Carabus	chamissonis	UK	8	17-Jun	F	19.136	1	124.3
Carabus	chamissonis	UK	8	17-Jun	F	18.952	1	124.3
Carabus	chamissonis	UK	6	2-Jul	F	18.1	1	124.3
Carabus	chamissonis	UK	8	2-Jul	F	18.995	1	124.3
Carabus	chamissonis	UK	8	2-Jul	F	17.478	1	124.3
Carabus	chamissonis	UK	3	2-Jul	F	19.638	1	124.3
Carabus	chamissonis	UK	3	2-Jul	F	18.838	1	124.3
Carabus	chamissonis	UK	4	2-Jul	M	16.942	1	124.3
Carabus	chamissonis	UK	5	2-Jul	F	19.729	1	124.3
Carabus	chamissonis	UK	2	2-Jul	F	18.89	1	124.3
Carabus	chamissonis	UK	1	2-Jul	M	16.48	1	124.3
Carabus	chamissonis	UK	3	17-Jun	M	17.281	1	124.3
Carabus	chamissonis	UK	3	17-Jun	M	17.711	1	124.3
Carabus	chamissonis	UK	3	17-Jun	F	18.913	1	124.3
Carabus	chamissonis	UK	3	17-Jun	F	18.714	1	124.3
Carabus	chamissonis	UK	5	17-Jun	M	17.566	1	124.3
Carabus	chamissonis	UK	7	17-Jun	F	19.754	1	124.3
Carabus	chamissonis	UK	7	17-Jun	F	17.87	1	124.3
Carabus	chamissonis	UK	7	17-Jun	F	18.382	1	124.3
Carabus	chamissonis	UK	7	17-Jun	F	17.826	1	124.3
Carabus	chamissonis	UK	7	17-Jun	F	18.071	1	124.3
Carabus	chamissonis	UK	7	17-Jun	M	17.431	1	124.3
Carabus	chamissonis	UK	7	17-Jun	M	16.49	1	124.3
Carabus	chamissonis	UK	7	17-Jun	M	17.831	1	124.3
Carabus	taedatus	BI	4	28-Jun	M	21.073	1	980.7
Carabus	taedatus	BI	4	23-Aug	M	21.452	1	980.7
Carabus	taedatus	BI	4	23-Aug	M	20.337	1	980.7
Carabus	taedatus	BI	4	23-Aug	M	21.429	1	980.7
Carabus	taedatus	BI	7	23-Aug	M	20.976	1	980.7
Carabus	taedatus	BI	7	23-Aug	F	22.517	1	980.7
Carabus	taedatus	BI	6	9-Aug	M	20.947	1	980.7
Carabus	taedatus	BI	6	9-Aug	M	21.078	1	980.7
Carabus	taedatus	BI	6	9-Aug	F	22.985	1	980.7
Carabus	taedatus	BI	6	9-Aug	F	21.498	1	980.7
Carabus	taedatus	BI	1	9-Aug	F	22.668	1	980.7
Carabus	taedatus	BI	1	9-Aug	F	22.038	1	980.7
Carabus	taedatus	BI	1	9-Aug	F	22.452	1	980.7
Carabus	taedatus	BI	1	9-Aug	M	21.32	1	980.7
Carabus	taedatus	BI	7	9-Aug	F	22.691	1	980.7
Carabus	taedatus	BI	5	9-Aug	F	21.609	1	980.7
Carabus	taedatus	BI	4	9-Aug	F	21.963	1	980.7
Carabus	taedatus	BI	4	9-Aug	F	21.204	1	980.7
Carabus	taedatus	BI	4	9-Aug	F	21.272	1	980.7
Carabus	taedatus	BI	4	9-Aug	M	22.242	1	980.7
Carabus	taedatus	BI	4	9-Aug	M	21.475	1	980.7
Carabus	taedatus	BI	4	9-Aug	M	20.717	1	980.7
Carabus	taedatus	BI	4	9-Aug	M	21.295	1	980.7
Carabus	taedatus	BI	4	9-Aug	M	22.153	1	980.7
Carabus	taedatus	BI	2	9-Aug	F	22.345	1	980.7
Carabus	taedatus	BI	3	9-Aug	M	20.438	1	980.7
Carabus	taedatus	BI	7	25-Jul	F	21.424	1	980.7
Carabus	taedatus	BI	4	25-Jul	M	21.116	1	980.7
Carabus	taedatus	BI	3	25-Jul	F	22.853	1	980.7
Carabus	taedatus	BI	8	25-Jul	M	20.693	1	980.7
Carabus	taedatus	BI	4	9-Aug	M	21.826	1	980.7
Carabus	taedatus	BI	6	25-Jul	F	22.239	1	980.7
Carabus	taedatus	BI	3	25-Jul	F	22.762	1	980.7
Carabus	taedatus	BI	1	25-Jul	F	21.216	1	980.7
Carabus	taedatus	BI	4	9-Aug	F	23.222	1	980.7
Carabus	taedatus	BI	6	9-Aug	M	22.227	1	980.7
Carabus	taedatus	BI	1	9-Aug	F	22.157	1	980.7
Carabus	taedatus	BI	7	23-Aug	F	21.927	1	980.7
Carabus	taedatus	BI	4	28-Jun	M	22.216	1	980.7
Carabus	taedatus	BI	4	28-Jun	M	21.735	1	980.7
Carabus	taedatus	BI	6	23-Aug	F	23.08	1	980.7
Carabus	taedatus	BI	6	23-Aug	F	22.23	1	980.7
Carabus	taedatus	BI	3	23-Aug	M	21.315	1	980.7
Carabus	taedatus	BI	3	23-Aug	M	22.085	1	980.7
Carabus	taedatus	BI	2	23-Aug	M	20.949	1	980.7
Carabus	taedatus	BI	2	23-Aug	F	22.853	1	980.7
Carabus	taedatus	BI	8	28-Jun	F	22.398	1	980.7
Carabus	taedatus	BI	3	28-Jun	F	21.624	1	980.7
Carabus	taedatus	BI	6	10-Jul	F	24.476	1	980.7
Carabus	taedatus	BI	3	10-Jul	M	20.854	1	980.7
Carabus	taedatus	BR	7	8-Aug	F	22.555	1	255.1
Carabus	taedatus	BR	3	8-Aug	F	22.457	1	255.1
Carabus	taedatus	BR	3	8-Aug	F	22.052	1	255.1
Carabus	taedatus	BR	3	8-Aug	M	21.397	1	255.1
Carabus	taedatus	BR	6	8-Aug	M	22.011	1	255.1
Carabus	taedatus	BR	6	8-Aug	F	21.134	1	255.1
Carabus	taedatus	BR	5	8-Aug	F	21.383	1	255.1
Carabus	taedatus	BR	5	8-Aug	F	22.08	1	255.1
Carabus	taedatus	BR	5	8-Aug	F	21.564	1	255.1
Carabus	taedatus	BR	5	8-Aug	M	21.746	1	255.1
Carabus	taedatus	BR	8	8-Aug	M	20.566	1	255.1
Carabus	taedatus	BR	8	8-Aug	M	21.83	1	255.1
Carabus	taedatus	BR	8	8-Aug	M	21.337	1	255.1
Carabus	taedatus	BR	8	8-Aug	F	21.313	1	255.1
Carabus	taedatus	BR	8	8-Aug	F	22.063	1	255.1
Carabus	taedatus	BR	8	8-Aug	F	21.612	1	255.1
Carabus	taedatus	BR	8	8-Aug	F	21.724	1	255.1
Carabus	taedatus	BR	8	8-Aug	F	22.239	1	255.1
Carabus	taedatus	BR	8	8-Aug	F	22.155	1	255.1
Carabus	taedatus	BR	4	8-Aug	F	20.551	1	255.1
Carabus	taedatus	BR	6	23-Jul	F	22.363	1	255.1
Carabus	taedatus	BR	2	23-Jul	F	21.558	1	255.1
Carabus	taedatus	BR	2	23-Jul	F	21.049	1	255.1
Carabus	taedatus	BR	3	23-Jul	M	20.424	1	255.1
Carabus	taedatus	BR	8	23-Jul	M	20.886	1	255.1
Carabus	taedatus	BR	8	23-Jul	M	20.303	1	255.1
Carabus	taedatus	BR	3	23-Jul	F	21.441	1	255.1
Carabus	taedatus	BR	1	23-Jul	F	21.356	1	255.1
Carabus	taedatus	BR	5	23-Jul	F	22.331	1	255.1
Carabus	taedatus	BR	8	8-Aug	M	22.199	1	255.1
Carabus	taedatus	BR	7	8-Aug	M	20.98	1	255.1
Carabus	taedatus	BR	2	8-Aug	F	21.729	1	255.1
Carabus	taedatus	BR	2	8-Aug	F	22.463	1	255.1
Carabus	taedatus	BR	3	22-Aug	F	23.366	1	255.1
Carabus	taedatus	BR	8	22-Aug	F	23.276	1	255.1
Carabus	taedatus	BR	8	22-Aug	F	22.122	1	255.1
Carabus	taedatus	BR	8	22-Aug	M	20.984	1	255.1
Carabus	taedatus	BR	8	22-Aug	M	20.622	1	255.1
Carabus	taedatus	BR	1	22-Aug	M	21.47	1	255.1
Carabus	taedatus	BR	1	22-Aug	M	19.978	1	255.1
Carabus	taedatus	BR	1	22-Aug	F	22.23	1	255.1
Carabus	taedatus	BR	5	22-Aug	M	20.58	1	255.1
Carabus	taedatus	BR	5	22-Aug	M	21.375	1	255.1
Carabus	taedatus	BR	6	22-Aug	M	21.513	1	255.1
Carabus	taedatus	BR	7	22-Aug	M	21.548	1	255.1
Carabus	taedatus	BR	7	22-Aug	M	21.16	1	255.1
Carabus	taedatus	BR	7	22-Aug	F	22.804	1	255.1
Carabus	taedatus	BR	7	22-Aug	F	21.98	1	255.1
Carabus	taedatus	BR	3	9-Jul	F	21.54	1	255.1
Carabus	taedatus	JO	8	2-Aug	M	21.143	1	130.2
Carabus	taedatus	JO	8	2-Aug	F	21.8	1	130.2
Carabus	taedatus	JO	2	2-Aug	M	20.394	1	130.2
Carabus	taedatus	JO	2	2-Aug	M	21.791	1	130.2
Carabus	taedatus	JO	2	2-Aug	F	21.683	1	130.2
Carabus	taedatus	JO	2	2-Aug	F	22.776	1	130.2
Carabus	taedatus	JO	1	2-Aug	F	20.909	1	130.2
Carabus	taedatus	JO	1	2-Aug	F	22.209	1	130.2
Carabus	taedatus	JO	1	2-Aug	M	21.59	1	130.2
Carabus	taedatus	JO	1	2-Aug	M	21.277	1	130.2
Carabus	taedatus	JO	1	2-Aug	M	21.072	1	130.2
Carabus	taedatus	JO	1	2-Aug	M	19.607	1	130.2
Carabus	taedatus	JO	7	2-Aug	F	20.668	1	130.2
Carabus	taedatus	JO	7	2-Aug	M	20.851	1	130.2
Carabus	taedatus	JO	7	2-Aug	M	20.927	1	130.2
Carabus	taedatus	JO	7	2-Aug	M	21.32	1	130.2
Carabus	taedatus	JO	7	2-Aug	M	22.203	1	130.2
Carabus	taedatus	JO	2	2-Aug	F	21.065	1	130.2
Carabus	taedatus	JO	2	2-Aug	F	22.258	1	130.2
Carabus	taedatus	JO	2	19-Jul	M	20.338	1	130.2
Carabus	taedatus	JO	6	19-Jul	M	20.701	1	130.2
Carabus	taedatus	JO	6	19-Jul	M	20.244	1	130.2
Carabus	taedatus	JO	6	19-Jul	F	21.658	1	130.2
Carabus	taedatus	JO	7	2-Aug	F	22.399	1	130.2
Carabus	taedatus	JO	1	2-Aug	M	22.47	1	130.2
Carabus	taedatus	JO	5	2-Aug	M	22.189	1	130.2
Carabus	taedatus	JO	5	2-Aug	F	22.747	1	130.2
Carabus	taedatus	JO	6	2-Aug	F	21.211	1	130.2
Carabus	taedatus	JO	6	2-Aug	F	21.624	1	130.2
Carabus	taedatus	JO	6	2-Aug	M	22.273	1	130.2
Carabus	taedatus	JO	6	2-Aug	M	21.891	1	130.2
Carabus	taedatus	JO	6	2-Aug	M	22.096	1	130.2
Carabus	taedatus	JO	4	2-Aug	F	22.746	1	130.2
Carabus	taedatus	JO	3	2-Aug	M	21.083	1	130.2
Carabus	taedatus	JO	3	2-Aug	M	20.96	1	130.2
Carabus	taedatus	JO	8	16-Aug	F	22.913	1	130.2
Carabus	taedatus	JO	8	16-Aug	F	20.855	1	130.2
Carabus	taedatus	JO	8	16-Aug	M	22.021	1	130.2
Carabus	taedatus	JO	7	16-Aug	F	22.35	1	130.2
Carabus	taedatus	JO	7	16-Aug	F	23.047	1	130.2
Carabus	taedatus	JO	7	16-Aug	F	22.354	1	130.2
Carabus	taedatus	JO	7	16-Aug	F	22.558	1	130.2
Carabus	taedatus	JO	7	16-Aug	M	21.908	1	130.2
Carabus	taedatus	JO	7	16-Aug	M	19.328	1	130.2
Carabus	taedatus	JO	7	16-Aug	M	21.245	1	130.2
Carabus	taedatus	JO	7	16-Aug	M	21.37	1	130.2
Carabus	taedatus	JO	1	16-Aug	M	21.674	1	130.2
Carabus	taedatus	JO	1	16-Aug	F	22.405	1	130.2
Carabus	taedatus	JO	1	16-Aug	F	21.229	1	130.2
Carabus	taedatus	JO	2	16-Aug	F	22.062	1	130.2
Carabus	taedatus	JO	2	16-Aug	F	22.021	1	130.2
Carabus	taedatus	JO	2	16-Aug	M	20.596	1	130.2
Carabus	taedatus	JO	4	16-Aug	F	22.631	1	130.2
Carabus	taedatus	JO	4	16-Aug	M	21.088	1	130.2
Carabus	taedatus	JO	3	16-Aug	M	22.643	1	130.2
Carabus	taedatus	JO	3	16-Aug	F	21.947	1	130.2
Carabus	taedatus	JO	5	16-Aug	F	21.553	1	130.2
Carabus	taedatus	JO	5	16-Aug	F	22.905	1	130.2
Carabus	taedatus	JO	5	16-Aug	F	20.284	1	130.2
Carabus	taedatus	JO	6	16-Aug	F	22.328	1	130.2
Carabus	taedatus	JO	6	16-Aug	F	23.472	1	130.2
Carabus	taedatus	JO	6	16-Aug	M	21.947	1	130.2
Carabus	taedatus	LG	2	2-Aug	M	21.386	1	0.6
Carabus	taedatus	LO	6	2-Aug	M	20.376	1	15.1
Carabus	taedatus	LO	6	2-Aug	M	19.993	1	15.1
Carabus	taedatus	LO	6	2-Aug	M	19.197	1	15.1
Carabus	taedatus	LO	6	2-Aug	F	22.114	1	15.1
Carabus	taedatus	LO	6	2-Aug	F	21.684	1	15.1
Carabus	taedatus	LO	6	2-Aug	F	19.982	1	15.1
Carabus	taedatus	LO	6	2-Aug	F	21.492	1	15.1
Carabus	taedatus	LO	6	2-Aug	F	21.791	1	15.1
Carabus	taedatus	LO	6	2-Aug	F	21.638	1	15.1
Carabus	taedatus	LO	5	2-Aug	F	21.618	1	15.1
Carabus	taedatus	LO	5	2-Aug	M	21.135	1	15.1
Carabus	taedatus	LO	8	2-Aug	M	21.105	1	15.1
Carabus	taedatus	LO	8	2-Aug	F	23.631	1	15.1
Carabus	taedatus	LO	8	2-Aug	F	22.307	1	15.1
Carabus	taedatus	LO	2	2-Aug	F	20.865	1	15.1
Carabus	taedatus	LO	7	2-Aug	M	21.004	1	15.1
Carabus	taedatus	LO	7	2-Aug	M	21.14	1	15.1
Carabus	taedatus	LO	7	2-Aug	M	20.573	1	15.1
Carabus	taedatus	LO	7	2-Aug	F	21.716	1	15.1
Carabus	taedatus	LO	7	2-Aug	F	22.058	1	15.1
Carabus	taedatus	LO	7	2-Aug	F	22.837	1	15.1
Carabus	taedatus	LO	4	2-Aug	F	21.293	1	15.1
Carabus	taedatus	LO	4	2-Aug	M	20.434	1	15.1
Carabus	taedatus	LO	4	2-Aug	M	21.403	1	15.1
Carabus	taedatus	LO	7	19-Jul	F	20.112	1	15.1
Carabus	taedatus	LO	7	19-Jul	M	20.874	1	15.1
Carabus	taedatus	LO	7	19-Jul	M	21.939	1	15.1
Carabus	taedatus	LO	7	19-Jul	M	19.26	1	15.1
Carabus	taedatus	LO	6	19-Jul	M	22.174	1	15.1
Carabus	taedatus	LO	6	19-Jul	M	19.744	1	15.1
Carabus	taedatus	LO	6	19-Jul	M	20.627	1	15.1
Carabus	taedatus	LO	4	19-Jun	M	20.991	1	15.1
Carabus	taedatus	LO	3	19-Jun	M	21.699	1	15.1
Carabus	taedatus	LO	5	19-Jun	M	20.722	1	15.1
Carabus	taedatus	LO	5	19-Jun	F	21.65	1	15.1
Carabus	taedatus	LO	1	19-Jun	M	20.885	1	15.1
Carabus	taedatus	LO	1	19-Jun	F	21.377	1	15.1
Carabus	taedatus	LO	3	2-Aug	M	21.44	1	15.1
Carabus	taedatus	LO	3	2-Aug	M	20.062	1	15.1
Carabus	taedatus	LO	3	2-Aug	F	20.931	1	15.1
Carabus	taedatus	LO	7	16-Aug	M	21.514	1	15.1
Carabus	taedatus	LO	7	16-Aug	M	22.688	1	15.1
Carabus	taedatus	LO	7	16-Aug	F	21.89	1	15.1
Carabus	taedatus	LO	7	16-Aug	F	21.852	1	15.1
Carabus	taedatus	LO	5	16-Aug	F	22.771	1	15.1
Carabus	taedatus	LO	5	16-Aug	F	21.599	1	15.1
Carabus	taedatus	LO	1	16-Aug	F	20.409	1	15.1
Carabus	taedatus	LO	6	16-Aug	M	20.235	1	15.1
Carabus	taedatus	LO	6	16-Aug	M	21.922	1	15.1
Carabus	taedatus	LO	6	16-Aug	M	19.079	1	15.1
Carabus	taedatus	LO	6	16-Aug	M	20.997	1	15.1
Carabus	taedatus	LO	6	16-Aug	M	22.609	1	15.1
Carabus	taedatus	LO	6	16-Aug	M	21.123	1	15.1
Carabus	taedatus	LO	6	16-Aug	M	20.695	1	15.1
Carabus	taedatus	LO	6	16-Aug	F	21.975	1	15.1
Carabus	taedatus	LO	6	16-Aug	F	21.898	1	15.1
Carabus	taedatus	LO	6	16-Aug	F	21.287	1	15.1
Carabus	taedatus	LO	6	16-Aug	F	22.624	1	15.1
Carabus	taedatus	LO	6	16-Aug	F	20.373	1	15.1
Carabus	taedatus	LO	6	16-Aug	F	22.887	1	15.1
Carabus	taedatus	LO	6	16-Aug	F	20.446	1	15.1
Carabus	taedatus	LO	3	16-Aug	F	23.428	1	15.1
Carabus	taedatus	LO	3	16-Aug	M	20.498	1	15.1
Carabus	taedatus	LV	6	28-Jun	F	22.454	1	169.1
Carabus	taedatus	LV	2	25-Jul	M	21.584	1	169.1
Carabus	taedatus	LZ	5	2-Aug	F	22.545	1	289.2
Carabus	taedatus	LZ	1	2-Aug	F	22.467	1	289.2
Carabus	taedatus	LZ	1	2-Aug	F	22.677	1	289.2
Carabus	taedatus	LZ	1	2-Aug	F	21.742	1	289.2
Carabus	taedatus	LZ	1	2-Aug	M	19.405	1	289.2
Carabus	taedatus	LZ	3	2-Aug	F	21.94	1	289.2
Carabus	taedatus	LZ	4	2-Aug	F	22.851	1	289.2
Carabus	taedatus	LZ	4	2-Aug	F	21.893	1	289.2
Carabus	taedatus	LZ	8	2-Aug	F	21.441	1	289.2
Carabus	taedatus	LZ	8	2-Aug	F	22.696	1	289.2
Carabus	taedatus	LZ	8	2-Aug	F	22.015	1	289.2
Carabus	taedatus	LZ	6	2-Aug	F	21.99	1	289.2
Carabus	taedatus	LZ	6	2-Aug	F	19.578	1	289.2
Carabus	taedatus	LZ	1	19-Jul	F	22.02	1	289.2
Carabus	taedatus	LZ	4	2-Aug	F	20.578	1	289.2
Carabus	taedatus	LZ	5	19-Jun	M	20.738	1	289.2
Carabus	taedatus	LZ	3	19-Jun	F	23.518	1	289.2
Carabus	taedatus	LZ	2	2-Aug	F	21.985	1	289.2
Carabus	taedatus	LZ	2	2-Aug	F	22.648	1	289.2
Carabus	taedatus	LZ	1	16-Aug	F	21.945	1	289.2
Carabus	taedatus	LZ	1	16-Aug	F	21.83	1	289.2
Carabus	taedatus	LZ	1	16-Aug	M	21.365	1	289.2
Carabus	taedatus	LZ	8	16-Aug	F	23.234	1	289.2
Carabus	taedatus	LZ	8	16-Aug	F	21.925	1	289.2
Carabus	taedatus	LZ	7	16-Aug	F	21.792	1	289.2
Carabus	taedatus	LZ	7	16-Aug	F	21.622	1	289.2
Carabus	taedatus	LZ	7	16-Aug	M	20.5	1	289.2
Carabus	taedatus	LZ	6	16-Aug	F	22.057	1	289.2
Carabus	taedatus	LZ	6	16-Aug	F	22.338	1	289.2
Carabus	taedatus	LZ	6	16-Aug	F	23.489	1	289.2
Carabus	taedatus	LZ	6	16-Aug	M	20.022	1	289.2
Carabus	taedatus	NC	8	1-Aug	M	21.874	1	19.3
Carabus	taedatus	NC	5	17-Jul	M	21.068	1	19.3
Carabus	taedatus	NC	5	15-Aug	F	22.233	1	19.3
Carabus	taedatus	NC	6	15-Aug	M	21.161	1	19.3
Carabus	taedatus	NC	6	15-Aug	M	21.453	1	19.3
Carabus	taedatus	NC	4	15-Aug	F	20.322	1	19.3
Carabus	taedatus	NT	3	15-Aug	F	21.705	1	43.2
Carabus	taedatus	SD	4	9-Jul	F	20.983	1	8.2
Carabus	taedatus	SD	7	9-Jul	F	22.079	1	8.2
Carabus	taedatus	SD	3	27-Jun	F	22.062	1	8.2
Carabus	taedatus	SD	2	8-Aug	M	20.685	1	8.2
Carabus	taedatus	SD	2	23-Jul	M	20.696	1	8.2
Carabus	taedatus	SD	2	9-Jul	M	19.953	1	8.2
Carabus	taedatus	SD	2	9-Jul	M	21.038	1	8.2
Carabus	taedatus	SD	8	8-Aug	F	20.744	1	8.2
Carabus	taedatus	SD	4	22-Aug	F	22.348	1	8.2
Carabus	taedatus	TB	5	1-Aug	F	21.716	1	19.5
Pterostichus	adstrictus	AL	5	8-Jul	F	12.111	1	0.7
Pterostichus	adstrictus	AL	5	8-Jul	F	11.233	1	0.7
Pterostichus	adstrictus	AL	5	8-Jul	F	11.772	1	0.7
Pterostichus	adstrictus	AL	5	8-Jul	F	12.339	1	0.7
Pterostichus	adstrictus	AL	5	8-Jul	F	11.569	1	0.7
Pterostichus	adstrictus	AL	5	8-Jul	F	12.249	1	0.7
Pterostichus	adstrictus	AL	5	8-Jul	M	11.436	1	0.7
Pterostichus	adstrictus	AL	5	8-Jul	M	11.621	1	0.7
Pterostichus	adstrictus	AL	5	8-Jul	M	11.831	1	0.7
Pterostichus	adstrictus	AL	1	8-Jul	M	12.932	1	0.7
Pterostichus	adstrictus	AL	7	25-Jun	M	12.983	1	0.7
Pterostichus	adstrictus	AL	7	25-Jun	M	12.5	1	0.7
Pterostichus	adstrictus	AL	7	25-Jun	M	12.46	1	0.7
Pterostichus	adstrictus	AL	7	25-Jun	M	12.153	1	0.7
Pterostichus	adstrictus	AL	7	25-Jun	M	11.68	1	0.7
Pterostichus	adstrictus	AL	7	25-Jun	M	13.158	1	0.7
Pterostichus	adstrictus	AL	7	25-Jun	M	11.735	1	0.7
Pterostichus	adstrictus	AL	7	25-Jun	M	11.517	1	0.7
Pterostichus	adstrictus	AL	7	25-Jun	F	12.311	1	0.7
Pterostichus	adstrictus	AL	7	25-Jun	F	11.957	1	0.7
Pterostichus	adstrictus	AL	7	25-Jun	F	11.839	1	0.7
Pterostichus	adstrictus	AL	7	25-Jun	F	11.893	1	0.7
Pterostichus	adstrictus	AL	4	25-Jun	M	12.182	1	0.7
Pterostichus	adstrictus	AL	4	25-Jun	M	11.397	1	0.7
Pterostichus	adstrictus	AL	4	25-Jun	M	12.338	1	0.7
Pterostichus	adstrictus	AL	4	25-Jun	F	12.917	1	0.7
Pterostichus	adstrictus	AL	4	25-Jun	F	12.235	1	0.7
Pterostichus	adstrictus	AL	4	25-Jun	F	11.493	1	0.7
Pterostichus	adstrictus	AL	4	25-Jun	F	12.245	1	0.7
Pterostichus	adstrictus	AL	4	25-Jun	F	10.414	1	0.7
Pterostichus	adstrictus	AL	4	25-Jun	F	11.487	1	0.7
Pterostichus	adstrictus	AL	4	25-Jun	F	11.422	1	0.7
Pterostichus	adstrictus	AL	4	25-Jun	F	12.884	1	0.7
Pterostichus	adstrictus	AL	5	25-Jun	M	12.41	1	0.7
Pterostichus	adstrictus	AL	5	25-Jun	M	12.189	1	0.7
Pterostichus	adstrictus	AL	5	25-Jun	F	12.998	1	0.7
Pterostichus	adstrictus	AL	5	25-Jun	F	11.785	1	0.7
Pterostichus	adstrictus	AL	5	25-Jun	F	11.874	1	0.7
Pterostichus	adstrictus	AL	5	25-Jun	F	11.104	1	0.7
Pterostichus	adstrictus	AL	5	25-Jun	F	12.49	1	0.7
Pterostichus	adstrictus	AL	6	25-Jun	M	10.936	1	0.7
Pterostichus	adstrictus	AL	6	25-Jun	M	12.002	1	0.7
Pterostichus	adstrictus	AL	6	25-Jun	F	12.465	1	0.7
Pterostichus	adstrictus	AL	6	25-Jun	F	12.209	1	0.7
Pterostichus	adstrictus	AL	6	25-Jun	F	12.531	1	0.7
Pterostichus	adstrictus	AL	6	25-Jun	F	11.276	1	0.7
Pterostichus	adstrictus	AL	6	25-Jun	F	11.317	1	0.7
Pterostichus	adstrictus	AL	3	25-Jun	M	10.889	1	0.7
Pterostichus	adstrictus	AL	3	25-Jun	M	12.218	1	0.7
Pterostichus	adstrictus	AL	3	25-Jun	F	11.225	1	0.7
Pterostichus	adstrictus	AL	3	25-Jun	F	11.865	1	0.7
Pterostichus	adstrictus	AL	3	25-Jun	F	10.95	1	0.7
Pterostichus	adstrictus	AL	3	25-Jun	F	11.697	1	0.7
Pterostichus	adstrictus	AL	1	25-Jun	F	11.998	1	0.7
Pterostichus	adstrictus	AL	1	25-Jun	F	11.751	1	0.7
Pterostichus	adstrictus	AL	1	25-Jun	F	12.184	1	0.7
Pterostichus	adstrictus	AL	1	25-Jun	M	12.103	1	0.7
Pterostichus	adstrictus	BI	4	28-Jun	F	12.573	1	980.7
Pterostichus	adstrictus	BI	4	28-Jun	F	12.189	1	980.7
Pterostichus	adstrictus	BI	4	28-Jun	M	11.079	1	980.7
Pterostichus	adstrictus	BI	4	25-Jul	F	11.842	1	980.7
Pterostichus	adstrictus	BI	4	25-Jul	F	13.363	1	980.7
Pterostichus	adstrictus	BI	4	25-Jul	M	11.14	1	980.7
Pterostichus	adstrictus	BI	7	28-Jun	F	12.342	1	980.7
Pterostichus	adstrictus	BI	7	28-Jun	M	12.448	1	980.7
Pterostichus	adstrictus	BI	8	10-Jul	F	12.998	1	980.7
Pterostichus	adstrictus	BI	7	10-Jul	F	11.405	1	980.7
Pterostichus	adstrictus	BI	1	10-Jul	M	11.388	1	980.7
Pterostichus	adstrictus	BR	5	22-Aug	F	11.732	1	255.1
Pterostichus	adstrictus	BR	7	9-Jul	M	11.85	1	255.1
Pterostichus	adstrictus	BR	5	9-Jul	F	12.599	1	255.1
Pterostichus	adstrictus	BR	5	9-Jul	F	13.573	1	255.1
Pterostichus	adstrictus	BR	3	8-Aug	M	12.074	1	255.1
Pterostichus	adstrictus	BR	5	8-Aug	F	11.869	1	255.1
Pterostichus	adstrictus	BR	5	23-Jul	F	12.416	1	255.1
Pterostichus	adstrictus	BR	5	23-Jul	F	12.827	1	255.1
Pterostichus	adstrictus	BR	5	23-Jul	F	10.685	1	255.1
Pterostichus	adstrictus	BR	2	23-Jul	F	11.471	1	255.1
Pterostichus	adstrictus	BR	1	23-Jul	F	12.01	1	255.1
Pterostichus	adstrictus	BR	3	23-Jul	M	11.682	1	255.1
Pterostichus	adstrictus	BR	3	9-Jul	F	11.533	1	255.1
Pterostichus	adstrictus	BR	3	9-Jul	F	12.362	1	255.1
Pterostichus	adstrictus	BR	3	27-Jun	M	11.157	1	255.1
Pterostichus	adstrictus	BR	3	27-Jun	F	12.474	1	255.1
Pterostichus	adstrictus	BR	3	27-Jun	F	12.228	1	255.1
Pterostichus	adstrictus	BR	5	27-Jun	F	12.39	1	255.1
Pterostichus	adstrictus	BR	5	27-Jun	F	11.748	1	255.1
Pterostichus	adstrictus	BR	5	27-Jun	M	12.417	1	255.1
Pterostichus	adstrictus	BR	5	27-Jun	M	12.325	1	255.1
Pterostichus	adstrictus	BR	1	27-Jun	F	12.726	1	255.1
Pterostichus	adstrictus	BR	1	27-Jun	F	12.591	1	255.1
Pterostichus	adstrictus	BR	1	27-Jun	M	11.734	1	255.1
Pterostichus	adstrictus	BR	4	27-Jun	F	12.193	1	255.1
Pterostichus	adstrictus	BR	4	27-Jun	F	11.721	1	255.1
Pterostichus	adstrictus	BR	4	27-Jun	F	11.735	1	255.1
Pterostichus	adstrictus	BR	8	27-Jun	F	12.735	1	255.1
Pterostichus	adstrictus	BR	8	27-Jun	F	12.038	1	255.1
Pterostichus	adstrictus	BR	8	27-Jun	F	12.869	1	255.1
Pterostichus	adstrictus	BR	8	27-Jun	M	11.985	1	255.1
Pterostichus	adstrictus	BR	8	27-Jun	M	11.841	1	255.1
Pterostichus	adstrictus	BR	4	9-Jul	F	12.862	1	255.1
Pterostichus	adstrictus	CC	8	3-Jul	M	11.669	1	21.1
Pterostichus	adstrictus	CC	8	3-Jul	F	13.307	1	21.1
Pterostichus	adstrictus	CC	7	3-Jul	F	12.676	1	21.1
Pterostichus	adstrictus	CC	3	3-Jul	F	12.299	1	21.1
Pterostichus	adstrictus	CC	8	19-Jun	M	10.925	1	21.1
Pterostichus	adstrictus	CC	8	19-Jun	F	14.172	1	21.1
Pterostichus	adstrictus	CC	8	19-Jun	F	12.9	1	21.1
Pterostichus	adstrictus	CC	2	19-Jun	F	11.682	1	21.1
Pterostichus	adstrictus	CC	8	18-Jul	F	12.676	1	21.1
Pterostichus	adstrictus	CC	8	18-Jul	F	12.348	1	21.1
Pterostichus	adstrictus	CC	5	3-Jul	F	12.08	1	21.1
Pterostichus	adstrictus	CC	7	19-Jul	F	12.363	1	21.1
Pterostichus	adstrictus	CC	7	19-Jul	M	13.589	1	21.1
Pterostichus	adstrictus	CC	8	30-Jul	F	11.851	1	21.1
Pterostichus	adstrictus	CD	5	18-Jun	F	11.845	1	3.2
Pterostichus	adstrictus	CD	5	18-Jun	F	11.686	1	3.2
Pterostichus	adstrictus	CD	5	18-Jun	F	12.737	1	3.2
Pterostichus	adstrictus	CD	4	18-Jun	F	11.732	1	3.2
Pterostichus	adstrictus	CD	1	18-Jun	F	10.82	1	3.2
Pterostichus	adstrictus	CD	1	18-Jun	F	11.492	1	3.2
Pterostichus	adstrictus	CD	4	5-Jul	F	12.354	1	3.2
Pterostichus	adstrictus	CD	4	5-Jul	F	12.689	1	3.2
Pterostichus	adstrictus	CD	4	5-Jul	F	13.108	1	3.2
Pterostichus	adstrictus	CD	4	5-Jul	F	13.095	1	3.2
Pterostichus	adstrictus	CD	4	5-Jul	F	12.897	1	3.2
Pterostichus	adstrictus	CD	4	5-Jul	M	12.101	1	3.2
Pterostichus	adstrictus	CD	5	5-Jul	F	12.819	1	3.2
Pterostichus	adstrictus	CD	5	5-Jul	F	12.312	1	3.2
Pterostichus	adstrictus	CD	4	19-Jul	F	11.231	1	3.2
Pterostichus	adstrictus	CI	5	9-Jul	F	11.347	1	1.2
Pterostichus	adstrictus	CI	5	9-Jul	F	12.37	1	1.2
Pterostichus	adstrictus	CI	5	9-Jul	F	12.362	1	1.2
Pterostichus	adstrictus	CI	5	9-Jul	F	12.957	1	1.2
Pterostichus	adstrictus	CI	5	9-Jul	F	12.906	1	1.2
Pterostichus	adstrictus	CI	3	9-Jul	M	13.028	1	1.2
Pterostichus	adstrictus	CI	3	9-Jul	F	11.7	1	1.2
Pterostichus	adstrictus	CI	3	9-Jul	F	12.227	1	1.2
Pterostichus	adstrictus	CI	4	9-Jul	F	12.184	1	1.2
Pterostichus	adstrictus	CI	4	9-Jul	F	12.624	1	1.2
Pterostichus	adstrictus	CI	4	9-Jul	F	11.58	1	1.2
Pterostichus	adstrictus	CI	4	9-Jul	F	12.47	1	1.2
Pterostichus	adstrictus	CI	4	9-Jul	F	11.562	1	1.2
Pterostichus	adstrictus	CI	5	27-Jun	M	12.225	1	1.2
Pterostichus	adstrictus	CI	5	27-Jun	M	12.228	1	1.2
Pterostichus	adstrictus	CI	5	27-Jun	F	11.991	1	1.2
Pterostichus	adstrictus	CI	8	8-Aug	M	11.643	1	1.2
Pterostichus	adstrictus	CI	4	27-Jun	F	12.391	1	1.2
Pterostichus	adstrictus	CI	4	27-Jun	F	12.811	1	1.2
Pterostichus	adstrictus	CI	4	27-Jun	F	12.37	1	1.2
Pterostichus	adstrictus	CI	4	27-Jun	F	10.94	1	1.2
Pterostichus	adstrictus	CI	4	27-Jun	F	13.298	1	1.2
Pterostichus	adstrictus	CI	4	27-Jun	F	11.795	1	1.2
Pterostichus	adstrictus	CI	4	27-Jun	F	12.307	1	1.2
Pterostichus	adstrictus	CI	6	23-Jul	F	12.439	1	1.2
Pterostichus	adstrictus	CU	3	4-Jul	F	12.539	1	1.5
Pterostichus	adstrictus	CU	3	4-Jul	F	12.614	1	1.5
Pterostichus	adstrictus	CU	3	4-Jul	F	11.955	1	1.5
Pterostichus	adstrictus	CU	3	4-Jul	F	13.025	1	1.5
Pterostichus	adstrictus	CU	3	4-Jul	F	10.946	1	1.5
Pterostichus	adstrictus	CU	8	4-Jul	F	12.603	1	1.5
Pterostichus	adstrictus	CU	8	4-Jul	F	10.872	1	1.5
Pterostichus	adstrictus	CU	8	4-Jul	F	12.192	1	1.5
Pterostichus	adstrictus	CU	8	4-Jul	F	12.375	1	1.5
Pterostichus	adstrictus	CU	8	4-Jul	F	13.288	1	1.5
Pterostichus	adstrictus	CU	8	4-Jul	F	12.308	1	1.5
Pterostichus	adstrictus	CU	8	4-Jul	F	12.14	1	1.5
Pterostichus	adstrictus	CU	8	4-Jul	F	11.403	1	1.5
Pterostichus	adstrictus	CU	8	4-Jul	M	12.193	1	1.5
Pterostichus	adstrictus	CU	8	4-Jul	M	12.493	1	1.5
Pterostichus	adstrictus	CU	8	4-Jul	M	11.68	1	1.5
Pterostichus	adstrictus	CU	5	4-Jul	M	13.177	1	1.5
Pterostichus	adstrictus	CU	5	4-Jul	M	12.34	1	1.5
Pterostichus	adstrictus	CU	5	4-Jul	M	12.54	1	1.5
Pterostichus	adstrictus	CU	5	4-Jul	M	12.334	1	1.5
Pterostichus	adstrictus	CU	5	4-Jul	M	11.467	1	1.5
Pterostichus	adstrictus	CU	5	4-Jul	M	12.786	1	1.5
Pterostichus	adstrictus	CU	5	4-Jul	M	12.69	1	1.5
Pterostichus	adstrictus	CU	5	4-Jul	M	11.641	1	1.5
Pterostichus	adstrictus	CU	5	4-Jul	M	13.042	1	1.5
Pterostichus	adstrictus	CU	5	4-Jul	M	12.807	1	1.5
Pterostichus	adstrictus	CU	5	4-Jul	M	11.778	1	1.5
Pterostichus	adstrictus	CU	5	4-Jul	M	11.736	1	1.5
Pterostichus	adstrictus	CU	5	4-Jul	M	12.06	1	1.5
Pterostichus	adstrictus	CU	5	4-Jul	M	12.495	1	1.5
Pterostichus	adstrictus	CU	5	4-Jul	M	13.364	1	1.5
Pterostichus	adstrictus	CU	5	4-Jul	M	11.574	1	1.5
Pterostichus	adstrictus	CU	5	4-Jul	M	12.493	1	1.5
Pterostichus	adstrictus	CU	5	4-Jul	F	13.465	1	1.5
Pterostichus	adstrictus	CU	5	4-Jul	F	12.1	1	1.5
Pterostichus	adstrictus	CU	5	4-Jul	F	11.799	1	1.5
Pterostichus	adstrictus	CU	5	4-Jul	F	12.458	1	1.5
Pterostichus	adstrictus	CU	5	4-Jul	F	11.225	1	1.5
Pterostichus	adstrictus	CU	5	4-Jul	F	13.006	1	1.5
Pterostichus	adstrictus	CU	5	4-Jul	F	12.259	1	1.5
Pterostichus	adstrictus	DG	7	3-Jul	F	12.243	1	10.3
Pterostichus	adstrictus	DG	3	19-Jun	F	12.201	1	10.3
Pterostichus	adstrictus	DG	2	19-Jun	F	12.164	1	10.3
Pterostichus	adstrictus	DG	2	19-Jun	F	12.136	1	10.3
Pterostichus	adstrictus	DG	2	19-Jun	M	11.408	1	10.3
Pterostichus	adstrictus	DG	5	19-Jun	F	11.925	1	10.3
Pterostichus	adstrictus	DG	5	19-Jun	F	11.677	1	10.3
Pterostichus	adstrictus	DG	5	19-Jun	F	12.691	1	10.3
Pterostichus	adstrictus	DG	5	19-Jun	F	11.665	1	10.3
Pterostichus	adstrictus	DG	5	19-Jun	M	11.356	1	10.3
Pterostichus	adstrictus	DG	6	19-Jun	F	10.505	1	10.3
Pterostichus	adstrictus	DG	1	19-Jun	F	12.49	1	10.3
Pterostichus	adstrictus	DG	1	19-Jun	F	11.443	1	10.3
Pterostichus	adstrictus	DG	1	19-Jun	F	12.707	1	10.3
Pterostichus	adstrictus	DG	8	18-Jul	F	11.084	1	10.3
Pterostichus	adstrictus	DG	1	19-Jun	F	11.712	1	10.3
Pterostichus	adstrictus	DG	1	19-Jun	F	12.662	1	10.3
Pterostichus	adstrictus	DG	1	19-Jun	F	12.685	1	10.3
Pterostichus	adstrictus	DG	5	19-Jun	F	12.153	1	10.3
Pterostichus	adstrictus	DG	5	19-Jun	F	12.42	1	10.3
Pterostichus	adstrictus	DG	5	19-Jun	F	12.631	1	10.3
Pterostichus	adstrictus	DG	5	19-Jun	F	12.057	1	10.3
Pterostichus	adstrictus	DG	5	19-Jun	M	11.544	1	10.3
Pterostichus	adstrictus	EW	1	2-Jul	F	12.242	1	0.2
Pterostichus	adstrictus	EW	1	2-Jul	F	11.554	1	0.2
Pterostichus	adstrictus	EW	1	2-Jul	F	12.641	1	0.2
Pterostichus	adstrictus	EW	1	2-Jul	F	11.007	1	0.2
Pterostichus	adstrictus	EW	1	2-Jul	F	11.755	1	0.2
Pterostichus	adstrictus	EW	1	2-Jul	F	12.591	1	0.2
Pterostichus	adstrictus	EW	1	2-Jul	F	12.125	1	0.2
Pterostichus	adstrictus	EW	1	2-Jul	F	12.789	1	0.2
Pterostichus	adstrictus	EW	1	2-Jul	M	12.106	1	0.2
Pterostichus	adstrictus	EW	1	2-Jul	M	12.156	1	0.2
Pterostichus	adstrictus	EW	1	2-Jul	M	10.652	1	0.2
Pterostichus	adstrictus	EW	1	2-Jul	M	12.072	1	0.2
Pterostichus	adstrictus	EW	1	2-Jul	M	11.656	1	0.2
Pterostichus	adstrictus	EW	1	17-Jun	M	11.32	1	0.2
Pterostichus	adstrictus	EW	1	17-Jun	M	12.361	1	0.2
Pterostichus	adstrictus	EW	1	17-Jun	M	12.585	1	0.2
Pterostichus	adstrictus	EW	1	17-Jun	M	11.329	1	0.2
Pterostichus	adstrictus	EW	1	17-Jun	M	11.296	1	0.2
Pterostichus	adstrictus	EW	1	17-Jun	M	12.647	1	0.2
Pterostichus	adstrictus	EW	1	17-Jun	M	11.699	1	0.2
Pterostichus	adstrictus	EW	1	17-Jun	M	10.786	1	0.2
Pterostichus	adstrictus	EW	1	17-Jun	F	11.683	1	0.2
Pterostichus	adstrictus	EW	4	17-Jun	F	12.018	1	0.2
Pterostichus	adstrictus	EW	4	17-Jun	F	13.114	1	0.2
Pterostichus	adstrictus	EW	4	17-Jun	F	12.454	1	0.2
Pterostichus	adstrictus	EW	3	2-Jul	F	12.619	1	0.2
Pterostichus	adstrictus	EW	3	2-Jul	F	13.348	1	0.2
Pterostichus	adstrictus	EW	4	29-Jul	F	12.612	1	0.2
Pterostichus	adstrictus	EW	4	29-Jul	F	11.848	1	0.2
Pterostichus	adstrictus	EW	4	29-Jul	F	12.106	1	0.2
Pterostichus	adstrictus	EW	4	29-Jul	M	11.156	1	0.2
Pterostichus	adstrictus	EW	5	17-Jun	F	12.346	1	0.2
Pterostichus	adstrictus	EW	5	17-Jun	F	12.487	1	0.2
Pterostichus	adstrictus	EW	1	17-Jun	F	11.268	1	0.2
Pterostichus	adstrictus	EW	1	17-Jun	M	11.76	1	0.2
Pterostichus	adstrictus	EW	1	17-Jun	M	12.433	1	0.2
Pterostichus	adstrictus	EW	1	17-Jun	M	12.124	1	0.2
Pterostichus	adstrictus	EW	1	17-Jun	M	12.18	1	0.2
Pterostichus	adstrictus	EW	1	17-Jun	M	11.975	1	0.2
Pterostichus	adstrictus	EW	1	17-Jun	M	11.896	1	0.2
Pterostichus	adstrictus	FI	5	8-Aug	M	12.223	1	0.3
Pterostichus	adstrictus	FI	5	8-Aug	M	11.791	1	0.3
Pterostichus	adstrictus	FI	7	8-Aug	F	12.852	1	0.3
Pterostichus	adstrictus	FI	7	8-Aug	F	12.517	1	0.3
Pterostichus	adstrictus	FI	7	8-Aug	F	11.722	1	0.3
Pterostichus	adstrictus	FI	7	8-Aug	M	12.413	1	0.3
Pterostichus	adstrictus	FI	7	8-Aug	M	12.704	1	0.3
Pterostichus	adstrictus	FI	8	9-Jul	M	12.073	1	0.3
Pterostichus	adstrictus	FI	8	9-Jul	M	12.336	1	0.3
Pterostichus	adstrictus	FI	8	9-Jul	M	12.043	1	0.3
Pterostichus	adstrictus	FI	8	9-Jul	M	11.515	1	0.3
Pterostichus	adstrictus	FI	8	9-Jul	F	12.108	1	0.3
Pterostichus	adstrictus	FI	8	9-Jul	F	12.249	1	0.3
Pterostichus	adstrictus	FI	8	9-Jul	F	11.097	1	0.3
Pterostichus	adstrictus	FI	8	9-Jul	F	12.481	1	0.3
Pterostichus	adstrictus	FI	8	9-Jul	F	11.47	1	0.3
Pterostichus	adstrictus	FI	8	9-Jul	F	13.226	1	0.3
Pterostichus	adstrictus	FI	8	27-Jun	F	12.436	1	0.5
Pterostichus	adstrictus	FI	8	27-Jun	F	13.205	1	0.5
Pterostichus	adstrictus	FI	8	27-Jun	F	12.572	1	0.5
Pterostichus	adstrictus	FI	8	27-Jun	F	12.293	1	0.5
Pterostichus	adstrictus	FI	8	27-Jun	F	12.571	1	0.5
Pterostichus	adstrictus	FI	8	27-Jun	M	13.188	1	0.5
Pterostichus	adstrictus	FI	8	27-Jun	M	12.677	1	0.5
Pterostichus	adstrictus	FI	8	27-Jun	M	11.596	1	0.5
Pterostichus	adstrictus	FI	8	27-Jun	M	11.833	1	0.5
Pterostichus	adstrictus	FI	8	27-Jun	M	11.961	1	0.5
Pterostichus	adstrictus	FI	8	27-Jun	M	11.858	1	0.5
Pterostichus	adstrictus	FI	8	27-Jun	M	12.031	1	0.5
Pterostichus	adstrictus	FI	8	27-Jun	M	12.853	1	0.5
Pterostichus	adstrictus	FI	8	27-Jun	M	12.643	1	0.5
Pterostichus	adstrictus	FI	4	8-Aug	M	13.755	1	0.5
Pterostichus	adstrictus	FI	4	9-Jul	M	12.199	1	0.5
Pterostichus	adstrictus	FI	4	9-Jul	M	11.444	1	0.5
Pterostichus	adstrictus	FI	4	9-Jul	M	11.733	1	0.5
Pterostichus	adstrictus	FI	4	9-Jul	M	12.187	1	0.5
Pterostichus	adstrictus	FI	4	9-Jul	F	13.019	1	0.5
Pterostichus	adstrictus	FI	7	23-Jul	M	13.089	1	0.5
Pterostichus	adstrictus	FI	7	23-Jul	M	12.059	1	0.5
Pterostichus	adstrictus	FU	8	3-Jul	F	12.287	1	2.6
Pterostichus	adstrictus	FU	8	3-Jul	F	12.914	1	2.6
Pterostichus	adstrictus	FU	8	3-Jul	F	12.775	1	2.6
Pterostichus	adstrictus	FU	8	3-Jul	F	11.433	1	2.6
Pterostichus	adstrictus	FU	6	3-Jul	M	12.425	1	2.6
Pterostichus	adstrictus	FU	6	3-Jul	M	10.584	1	2.6
Pterostichus	adstrictus	FU	6	3-Jul	F	11.67	1	2.6
Pterostichus	adstrictus	FU	6	3-Jul	F	11.307	1	2.6
Pterostichus	adstrictus	FU	2	3-Jul	F	11.71	1	2.6
Pterostichus	adstrictus	FU	7	3-Jul	F	12.417	1	2.6
Pterostichus	adstrictus	FU	7	3-Jul	F	12.491	1	2.6
Pterostichus	adstrictus	FU	7	3-Jul	F	12.045	1	2.6
Pterostichus	adstrictus	FU	7	3-Jul	F	11.29	1	2.6
Pterostichus	adstrictus	FU	7	3-Jul	M	11.033	1	2.6
Pterostichus	adstrictus	FU	7	3-Jul	M	11.275	1	2.6
Pterostichus	adstrictus	FU	7	3-Jul	M	12.079	1	2.6
Pterostichus	adstrictus	FU	7	3-Jul	M	11.561	1	2.6
Pterostichus	adstrictus	FU	8	19-Jun	F	11.035	1	2.6
Pterostichus	adstrictus	FU	6	19-Jun	F	12.109	1	2.6
Pterostichus	adstrictus	FU	6	19-Jun	F	11.207	1	2.6
Pterostichus	adstrictus	FU	1	3-Jul	M	12.466	1	2.6
Pterostichus	adstrictus	FU	1	3-Jul	M	12.012	1	2.6
Pterostichus	adstrictus	FU	1	3-Jul	M	12.21	1	2.6
Pterostichus	adstrictus	FU	1	3-Jul	M	12.226	1	2.6
Pterostichus	adstrictus	FU	1	3-Jul	M	11.943	1	2.6
Pterostichus	adstrictus	FU	1	3-Jul	M	11.828	1	2.6
Pterostichus	adstrictus	FU	1	3-Jul	F	12.361	1	2.6
Pterostichus	adstrictus	FU	1	3-Jul	F	12.229	1	2.6
Pterostichus	adstrictus	FU	1	3-Jul	F	10.971	1	2.6
Pterostichus	adstrictus	FU	1	3-Jul	F	12.331	1	2.6
Pterostichus	adstrictus	FU	1	3-Jul	F	12.758	1	2.6
Pterostichus	adstrictus	FU	3	3-Jul	M	12.367	1	2.6
Pterostichus	adstrictus	FU	3	3-Jul	M	12.673	1	2.6
Pterostichus	adstrictus	FU	3	3-Jul	M	12.41	1	2.6
Pterostichus	adstrictus	FU	2	19-Jun	M	12.494	1	2.6
Pterostichus	adstrictus	FU	2	19-Jun	M	11.855	1	2.6
Pterostichus	adstrictus	FU	2	19-Jun	M	11.845	1	2.6
Pterostichus	adstrictus	FU	2	19-Jun	M	11.233	1	2.6
Pterostichus	adstrictus	FU	2	19-Jun	M	11.994	1	2.6
Pterostichus	adstrictus	FU	2	19-Jun	M	11.682	1	2.6
Pterostichus	adstrictus	GL	6	8-Jul	M	11.747	1	0.7
Pterostichus	adstrictus	GL	6	8-Jul	M	10.257	1	0.7
Pterostichus	adstrictus	GL	6	8-Jul	M	12.617	1	0.7
Pterostichus	adstrictus	GL	6	8-Jul	F	12.791	1	0.7
Pterostichus	adstrictus	GL	6	8-Jul	F	12.456	1	0.7
Pterostichus	adstrictus	GL	6	8-Jul	F	12.664	1	0.7
Pterostichus	adstrictus	GL	6	8-Jul	F	12.135	1	0.7
Pterostichus	adstrictus	GL	6	8-Jul	F	13.476	1	0.7
Pterostichus	adstrictus	GL	6	8-Jul	F	10.403	1	0.7
Pterostichus	adstrictus	GL	6	8-Jul	M	12.767	1	0.7
Pterostichus	adstrictus	GL	6	8-Jul	M	10.209	1	0.7
Pterostichus	adstrictus	GL	6	8-Jul	F	12.433	1	0.7
Pterostichus	adstrictus	GL	6	8-Jul	F	13.455	1	0.7
Pterostichus	adstrictus	GL	6	8-Jul	F	12.873	1	0.7
Pterostichus	adstrictus	GL	2	19-Aug	M	11.647	1	0.7
Pterostichus	adstrictus	GL	2	19-Aug	F	10.955	1	0.7
Pterostichus	adstrictus	GL	2	19-Aug	F	11.519	1	0.7
Pterostichus	adstrictus	GL	2	19-Aug	F	11.526	1	0.7
Pterostichus	adstrictus	GL	7	25-Jun	F	13.047	1	0.7
Pterostichus	adstrictus	GL	7	25-Jun	F	11.328	1	0.7
Pterostichus	adstrictus	GL	5	25-Jun	F	11.945	1	0.7
Pterostichus	adstrictus	GL	5	25-Jun	F	12.961	1	0.7
Pterostichus	adstrictus	GL	5	25-Jun	F	12.163	1	0.7
Pterostichus	adstrictus	GL	5	25-Jun	F	13.201	1	0.7
Pterostichus	adstrictus	GL	5	25-Jun	F	13.476	1	0.7
Pterostichus	adstrictus	GL	5	25-Jun	F	12.087	1	0.7
Pterostichus	adstrictus	GL	5	25-Jun	M	11.924	1	0.7
Pterostichus	adstrictus	GL	5	25-Jun	M	12.196	1	0.7
Pterostichus	adstrictus	GL	5	25-Jun	M	12.052	1	0.7
Pterostichus	adstrictus	GL	5	25-Jun	M	11.989	1	0.7
Pterostichus	adstrictus	GL	5	25-Jun	M	12.106	1	0.7
Pterostichus	adstrictus	GL	5	25-Jun	M	10.83	1	0.7
Pterostichus	adstrictus	GL	5	25-Jun	M	10.9	1	0.7
Pterostichus	adstrictus	GL	4	25-Jun	M	11.412	1	0.7
Pterostichus	adstrictus	GL	2	25-Jun	M	10.915	1	0.7
Pterostichus	adstrictus	GL	2	25-Jun	M	12.215	1	0.7
Pterostichus	adstrictus	GL	2	25-Jun	M	12.129	1	0.7
Pterostichus	adstrictus	GL	2	25-Jun	M	11.907	1	0.7
Pterostichus	adstrictus	GL	8	25-Jun	M	11.916	1	0.7
Pterostichus	adstrictus	GL	8	25-Jun	M	11.297	1	0.7
Pterostichus	adstrictus	HB	4	10-Jul	F	11.345	1	0.5
Pterostichus	adstrictus	HB	4	10-Jul	F	12.309	1	0.5
Pterostichus	adstrictus	HB	4	10-Jul	F	12.284	1	0.5
Pterostichus	adstrictus	HB	5	28-Jun	F	11.304	1	0.5
Pterostichus	adstrictus	HB	5	28-Jun	F	11.006	1	0.5
Pterostichus	adstrictus	HB	3	28-Jun	M	13.534	1	0.5
Pterostichus	adstrictus	HB	8	28-Jun	M	11.676	1	0.5
Pterostichus	adstrictus	HB	7	28-Jun	F	12.497	1	0.5
Pterostichus	adstrictus	HB	3	10-Jul	F	13.28	1	0.5
Pterostichus	adstrictus	HB	3	10-Jul	F	11.095	1	0.5
Pterostichus	adstrictus	HB	3	10-Jul	F	13.116	1	0.5
Pterostichus	adstrictus	HB	3	10-Jul	F	13.288	1	0.5
Pterostichus	adstrictus	HB	3	10-Jul	F	12.814	1	0.5
Pterostichus	adstrictus	HB	3	10-Jul	M	12.528	1	0.5
Pterostichus	adstrictus	HB	3	10-Jul	M	12.108	1	0.5
Pterostichus	adstrictus	HB	3	10-Jul	M	12.475	1	0.5
Pterostichus	adstrictus	HB	5	25-Jul	F	13.391	1	0.5
Pterostichus	adstrictus	JO	7	2-Aug	F	12.96	1	130.2
Pterostichus	adstrictus	JO	6	19-Jul	M	12.666	1	130.2
Pterostichus	adstrictus	JO	6	19-Jul	M	12.121	1	130.2
Pterostichus	adstrictus	JO	6	19-Jul	F	12.909	1	130.2
Pterostichus	adstrictus	JO	6	19-Jul	F	12.429	1	130.2
Pterostichus	adstrictus	JO	6	2-Aug	M	12.329	1	130.2
Pterostichus	adstrictus	JO	7	16-Aug	F	12.506	1	130.2
Pterostichus	adstrictus	JO	7	16-Aug	M	11.852	1	130.2
Pterostichus	adstrictus	JO	8	18-Jun	F	11.956	1	130.2
Pterostichus	adstrictus	JO	8	18-Jun	F	12.544	1	130.2
Pterostichus	adstrictus	JO	8	18-Jun	F	12.041	1	130.2
Pterostichus	adstrictus	JO	8	18-Jun	M	11.906	1	130.2
Pterostichus	adstrictus	JO	8	18-Jun	M	11.111	1	130.2
Pterostichus	adstrictus	JO	8	18-Jun	M	11.536	1	130.2
Pterostichus	adstrictus	JO	7	18-Jun	M	12.258	1	130.2
Pterostichus	adstrictus	JO	7	18-Jun	M	12.215	1	130.2
Pterostichus	adstrictus	JO	7	18-Jun	M	12.268	1	130.2
Pterostichus	adstrictus	JO	7	18-Jun	M	11.266	1	130.2
Pterostichus	adstrictus	JO	7	18-Jun	M	11.93	1	130.2
Pterostichus	adstrictus	JO	7	18-Jun	M	11.296	1	130.2
Pterostichus	adstrictus	JO	7	18-Jun	M	10.695	1	130.2
Pterostichus	adstrictus	JO	7	18-Jun	M	12.005	1	130.2
Pterostichus	adstrictus	JO	7	18-Jun	M	12.02	1	130.2
Pterostichus	adstrictus	JO	7	18-Jun	M	11.787	1	130.2
Pterostichus	adstrictus	JO	7	18-Jun	M	11.997	1	130.2
Pterostichus	adstrictus	JO	7	18-Jun	M	12.062	1	130.2
Pterostichus	adstrictus	JO	7	18-Jun	F	11.727	1	130.2
Pterostichus	adstrictus	JO	7	18-Jun	F	11.516	1	130.2
Pterostichus	adstrictus	JO	7	18-Jun	F	12.675	1	130.2
Pterostichus	adstrictus	JO	7	18-Jun	F	13.271	1	130.2
Pterostichus	adstrictus	JO	7	18-Jun	F	11.749	1	130.2
Pterostichus	adstrictus	JO	7	18-Jun	F	12.209	1	130.2
Pterostichus	adstrictus	JO	6	18-Jun	M	11.271	1	130.2
Pterostichus	adstrictus	JO	6	18-Jun	M	11.318	1	130.2
Pterostichus	adstrictus	JO	6	18-Jun	M	11.056	1	130.2
Pterostichus	adstrictus	JO	6	18-Jun	M	11.496	1	130.2
Pterostichus	adstrictus	JO	6	18-Jun	M	11.809	1	130.2
Pterostichus	adstrictus	JO	6	18-Jun	F	11.87	1	130.2
Pterostichus	adstrictus	JO	2	18-Jun	F	11.963	1	130.2
Pterostichus	adstrictus	JO	2	18-Jun	F	12.045	1	130.2
[truncated: 1,204 more rows]
